# Supplementary material for: HIR V2: a human interactome resource for the biological interpretation of differentially expressed genes via gene set linkage analysis
Source: Database (Oxford). 2021 Mar 2;2021:baab009. doi: 10.1093/database/baab009 (PMC7937034; doi:10.1093/database/baab009)
Supplement: baab009_Supp [file baab009_supp.zip]

Archive with 10 entries (10 files):
- Supplement figure S1.png
- Supplementary Figure s2.png
- Table S1 - HIR.pdf
- Table S2 - HIR.pdf
- Table S3 - HIR.pdf
- Table S4 - HIR.pdf
- Table S5 - HIR.pdf
- Table S6 - HIR.pdf
- Table S7 - HIR.pdf
- Table S8.pdf
