# Supplementary material for: HIR V2: a human interactome resource for the biological interpretation of differentially expressed genes via gene set linkage analysis
Source: Oxford University Press journal article supplement (doi:10.1093/database/baab009), 2021-01-01
Supplement: baab009_supp.zip [file baab009_supp.zip]

**Table S2. Number of protein interactions and their component proteins collected from three databases.**

| Database | All interactions       |                    | High confidence interactions* |                    | Date           |
|----------|------------------------|--------------------|-------------------------------|--------------------|----------------|
|          | Number of interactions | Number of Proteins | Number of interactions        | Number of Proteins |                |
| BioGrid  | 378997                 | 16782              | 4429                          | 2494               | Dec 25th, 2017 |
| Intact   | 310955                 | 22679              | 356                           | 477                | Dec 12th, 2017 |
| Total    | 319696                 | 16758              | 4509                          | 2559               |                |

\*High confidence interactions: interactions reported in more than four independent studies, at least one of which is low-throughput experiment.
