# Supplementary material for: HIR V2: a human interactome resource for the biological interpretation of differentially expressed genes via gene set linkage analysis
Source: Oxford University Press journal article supplement (doi:10.1093/database/baab009), 2021-01-01
Supplement: baab009_supp.zip [file baab009_supp.zip]

**Table S4. Evaluation of the predicted interactions in different datasets.**

| DataSet       | Coverage      | Reliability   |
|---------------|---------------|---------------|
| HPRD          | 21.79%        | 43.62%        |
| HI-III        | 1.07%         | 1.24%         |
| HIPPIE        | 88.46%        | 10.28%        |
| <b>HIR V2</b> | <b>32.48%</b> | <b>57.04%</b> |
| STRING        | 78.63%        | 1.66%         |
| UniHI         | 91.24%        | 36.85%        |
