# Supplementary material for: HIR V2: a human interactome resource for the biological interpretation of differentially expressed genes via gene set linkage analysis
Source: Oxford University Press journal article supplement (doi:10.1093/database/baab009), 2021-01-01
Supplement: baab009_supp.zip [file baab009_supp.zip]

**Table S3. Feature quality assessment.**

| Evidence                | type Feature             | AUC of | AUC > 0.6 |
|-------------------------|--------------------------|--------|-----------|
| Shared Annotation       | biological_process_value | 0.954  | Yes       |
|                         | molecular_function_value | 0.822  | Yes       |
|                         | cellular_component_value | 0.901  | Yes       |
| Coexpression            | RNAseq_value             | 0.846  | Yes       |
|                         | Microarray_value         | 0.706  | Yes       |
| Phylogenetic profile    | phyprofile_tanimato_valu | 0.735  | Yes       |
|                         | phyprofile_pearson_value | 0.549  | No        |
|                         | phyprofile_mutual_value  | 0.601  | Yes       |
| Colocation              | integrated_value         | 0.813  | Yes       |
|                         | knowledge_value          | 0.858  | Yes       |
|                         | predictions_value        | 0.649  | Yes       |
|                         | textmining_value         | 0.825  | Yes       |
| Domain Interactions     | 3DID_value               | 0.633  | Yes       |
|                         | INTERDOM_value           | 0.788  | Yes       |
|                         | TOPDOWN_value            | 0.673  | Yes       |
|                         | DIMA_DPEA_value          | 0.687  | Yes       |
|                         | APMM_value               | 0.686  | Yes       |
|                         | GPE_value                | 0.657  | Yes       |
|                         | PINS_value               | 0.585  | No        |
|                         | LLZ_value                | 0.546  | No        |
|                         | RDFF_value               | 0.589  | No        |
|                         | DIPD_value               | 0.556  | No        |
|                         | IPPRI_value              | 0.563  | No        |
|                         | ME_value                 | 0.590  | No        |
|                         | KGIDDI_value             | 0.580  | No        |
|                         | IPFAM_value              | 0.598  | No        |
|                         | DOMAINGA_value           | 0.520  | No        |
|                         | RCDP_value               | 0.535  | No        |
|                         | DIMA_DPROF_value         | 0.547  | No        |
|                         | PVALUE_value             | 0.526  | No        |
|                         | TW_value                 | 0.512  | No        |
|                         | HIMAP_value              | 0.531  | No        |
|                         | PE_value                 | 0.588  | No        |
|                         | DIMA_STRING_value        | 0.586  | No        |
|                         | DPEA_value               | 0.534  | No        |
| Homologous interactions | inparanoid_value         | 0.611  | Yes       |
