# Supplementary material for: HIR V2: a human interactome resource for the biological interpretation of differentially expressed genes via gene set linkage analysis
Source: Oxford University Press journal article supplement (doi:10.1093/database/baab009), 2021-01-01
Supplement: baab009_supp.zip [file baab009_supp.zip]

**Table S6. Annotations produced by DAVID for downregulated genes.**

| Annotation Cluster 1 |                                                            | Enrichment Score: 8.172057219758965  |             |             |                                                                                                 |            |          |           |                 |            |           |          |                |
|----------------------|------------------------------------------------------------|--------------------------------------|-------------|-------------|-------------------------------------------------------------------------------------------------|------------|----------|-----------|-----------------|------------|-----------|----------|----------------|
| Category             | Term                                                       | Count                                | %           | P-value     | Genes                                                                                           | List Total | Pop Hits | Pop Total | Fold Enrichment | Bonferroni | Benjamini | FDR      | Supported term |
| GOTERM_BP_DIRECT     | GO:0060337~type I interferon signaling pathway             | 11                                   | 11.34020619 | 1.75E-12    | IFIT3, IFIT2, IFI27, IFIT1, OASL, SP100, IFITM1, IFITM2, IRF8, RSAD2, STAT1                     | 93         | 64       | 16792     | 31.03360215     | 1.08E-09   | 1.08E-09  | 2.60E-09 | Y              |
| GOTERM_BP_DIRECT     | GO:0051607~defense response to virus                       | 13                                   | 13.40206186 | 9.96E-11    | IFIT3, IFIT2, IFIT1, OASL, IFITM1, IFITM2, FAM111A, CXCL9, RSAD2, APOBEC3G, STAT1, TLR7, CXCL10 | 93         | 165      | 16792     | 14.22587162     | 6.14E-08   | 3.07E-08  | 1.48E-07 | Y              |
| GOTERM_BP_DIRECT     | GO:0045071~negative regulation of viral genome replication | 8                                    | 8.24742268  | 1.89E-09    | IFIT1, OASL, IFITM1, IFITM2, FAM111A, RSAD2, APOBEC3G, CCL5                                     | 93         | 40       | 16792     | 36.11182796     | 1.16E-06   | 3.88E-07  | 2.80E-06 | Y              |
| UP_KEYWORDS          | Antiviral defense                                          | 10                                   | 10.30927835 | 3.61E-09    | IFIT3, IFIT2, IFIT1, OASL, IFITM1, IFITM2, FAM111A, RSAD2, APOBEC3G, STAT1                      | 97         | 116      | 20581     | 18.29097049     | 6.85E-07   | 6.85E-07  | 4.48E-06 | Y              |
| UP_KEYWORDS          | Innate immunity                                            | 11                                   | 11.34020619 | 3.92E-07    | IFIT3, IFIT2, C1QB, IFIT1, OASL, IFITM1, LYN, IFITM2, RSAD2, APOBEC3G, TLR7                     | 97         | 261      | 20581     | 8.942252242     | 7.45E-05   | 3.73E-05  | 4.87E-04 | Y              |
| UP_KEYWORDS          | Immunity                                                   | 14                                   | 14.43298969 | 5.65E-07    | LYN, IFITM1, IFITM2, RSAD2, APOBEC3G, IDO1, TLR7, IFIT3, C1QB, IFIT2, OASL, IFIT1, LILRA6, TXK  | 97         | 500      | 20581     | 5.940907216     | 1.07E-04   | 3.58E-05  | 7.02E-04 | Y              |
| GOTERM_BP_DIRECT     | GO:0009615~response to virus                               | 8                                    | 8.24742268  | 2.37E-06    | IFIT3, IFIT2, IFIT1, OASL, IFITM1, IFITM2, RSAD2, CCL5                                          | 93         | 110      | 16792     | 13.1315738      | 0.001457   | 3.64E-04  | 0.003507 | Y              |
| Annotation Cluster 2 |                                                            | Enrichment Score: 1.9203132998861563 |             |             |                                                                                                 |            |          |           |                 |            |           |          |                |
| Category             | Term                                                       | Count                                | %           | PValue      | Genes                                                                                           | List Total | Pop Hits | Pop Total | Fold Enrichment | Bonferroni | Benjamini | FDR      | Supported term |
| GOTERM_MF_DIRECT     | GO:0048248~CXCR3 chemokine receptor binding                | 3                                    | 3.092783505 | 2.72E-04    | CXCL9, CXCL11, CXCL10                                                                           | 90         | 5        | 16881     | 112.54          | 0.051154   | 0.051154  | 0.338445 | Y              |
| GOTERM_BP_DIRECT     | GO:0030816~positive regulation of cAMP metabolic process   | 3                                    | 3.092783505 | 4.39E-04    | CXCL9, CXCL11, CXCL10                                                                           | 93         | 6        | 16792     | 90.27956989     | 0.237019   | 0.052667  | 0.648826 | Y              |
| UP_KEYWORDS          | Inflammatory response                                      | 6                                    | 6.18556701  | 7.33E-04    | LYN, CXCL9, CCL5, CXCL11, TLR7, CXCL10                                                          | 97         | 152      | 20581     | 8.375339121     | 0.129999   | 0.022943  | 0.906821 | Y              |
| KEGG_PATHWAY         | hsa04620:Toll-like receptor signaling pathway              | 6                                    | 6.18556701  | 7.99E-04    | CXCL9, CCL5, CXCL11, STAT1, TLR7, CXCL10                                                        | 49         | 106      | 6879      | 7.946476704     | 0.067943   | 0.067943  | 0.862305 | Y              |
| SMART                | SM00199:SCY                                                | 4                                    | 4.12371134  | 0.001101356 | CXCL9, CCL5, CXCL11, CXCL10                                                                     | 49         | 43       | 10057     | 19.09254865     | 0.05465    | 0.05465   | 1.060373 | Y              |
| INTERPRO             | IPR001811:Chemokine interleukin-8-like domain              | 4                                    | 4.12371134  | 0.001533686 | CXCL9, CCL5, CXCL11, CXCL10                                                                     | 93         | 46       | 18559     | 17.35296868     | 0.340285   | 0.340285  | 1.998969 | Y              |
| INTERPRO             | IPR001089:CXC chemokine                                    | 3                                    | 3.092783505 | 0.001829765 | CXCL9, CXCL11, CXCL10                                                                           | 93         | 13       | 18559     | 46.05210918     | 0.391233   | 0.219765  | 2.380593 | Y              |
| INTERPRO             | IPR018048:CXC chemokine, conserved site                    | 3                                    | 3.092783505 | 0.001829765 | CXCL9, CXCL11, CXCL10                                                                           | 93         | 13       | 18559     | 46.05210918     | 0.391233   | 0.219765  | 2.380593 | Y              |
| GOTERM_BP_DIRECT     | GO:0043950~positive regulation of cAMP-mediated signaling  | 3                                    | 3.092783505 | 0.001890928 | CXCL9, CXCL11, CXCL10                                                                           | 93         | 12       | 16792     | 45.13978495     | 0.688362   | 0.135617  | 2.766481 | Y              |
| GOTERM_MF_DIRECT     | GO:0008009~chemokine activity                              | 4                                    | 4.12371134  | 0.002190451 | CXCL9, CCL5, CXCL11, CXCL10                                                                     | 90         | 49       | 16881     | 15.31156463     | 0.345066   | 0.19072   | 2.69548  | Y              |
| BBID                 | 109.Chemokine_families                                     | 4                                    | 4.12371134  | 0.00275159  | CXCL9, CCL5, CXCL11, CXCL10                                                                     | 6          | 27       | 388       | 9.580246914     | 0.035186   | 0.035186  | 1.807696 | Y              |

|                  |                                                                                   |    |             |             |                                                                           |    |      |       |             |          |          |          |   |
|------------------|-----------------------------------------------------------------------------------|----|-------------|-------------|---------------------------------------------------------------------------|----|------|-------|-------------|----------|----------|----------|---|
| GOTERM_BP_DIRECT | GO:0002690~positive regulation of leukocyte chemotaxis                            | 3  | 3.092783505 | 0.004290831 | CXCL9, CXCL11, CXCL10                                                     | 93 | 18   | 16792 | 30.09318996 | 0.929267 | 0.254959 | 6.174864 | Y |
| GOTERM_BP_DIRECT | GO:0006954~inflammatory response                                                  | 8  | 8.24742268  | 0.004783918 | APOL3, SP100, LYN, CXCL9, CCL5, CXCL11, TLR7, CXCL10                      | 93 | 379  | 16792 | 3.811274718 | 0.947867 | 0.255764 | 6.861212 | Y |
| GOTERM_BP_DIRECT | GO:0060326~cell chemotaxis                                                        | 4  | 4.12371134  | 0.005439928 | CXCL9, CCL5, ELMO2, CXCL10                                                | 93 | 65   | 16792 | 11.11133168 | 0.96527  | 0.263221 | 7.767081 | Y |
| GOTERM_BP_DIRECT | GO:0070098~chemokine-mediated signaling pathway                                   | 4  | 4.12371134  | 0.006952436 | CXCL9, CCL5, CXCL11, CXCL10                                               | 93 | 71   | 16792 | 10.1723459  | 0.9864   | 0.2815   | 9.824454 | Y |
| KEGG_PATHWAY     | hsa04062:Chemokine signaling pathway                                              | 6  | 6.18556701  | 0.009146018 | LYN, CXCL9, CCL5, CXCL11, STAT1, CXCL10                                   | 49 | 186  | 6879  | 4.528637261 | 0.554498 | 0.183018 | 9.47297  | Y |
| GOTERM_BP_DIRECT | GO:0051281~positive regulation of release of sequestered calcium ion into cytosol | 3  | 3.092783505 | 0.009534075 | CXCL9, CXCL11, CXCL10                                                     | 93 | 27   | 16792 | 20.06212664 | 0.997264 | 0.325249 | 13.23754 | Y |
| UP_KEYWORDS      | Cytokine                                                                          | 5  | 5.154639175 | 0.012094566 | TNFSF10, CXCL9, CCL5, CXCL11, CXCL10                                      | 97 | 190  | 20581 | 5.583559414 | 0.900935 | 0.226544 | 14.03546 | Y |
| GOTERM_BP_DIRECT | GO:0006955~immune response                                                        | 7  | 7.216494845 | 0.02810565  | TNFSF10, IFITM2, IRF8, CXCL9, CCL5, CXCL11, CXCL10                        | 93 | 421  | 16792 | 3.00217097  | 1        | 0.644063 | 34.46334 | Y |
| GOTERM_BP_DIRECT | GO:0006935~chemotaxis                                                             | 4  | 4.12371134  | 0.029439749 | CXCL9, CCL5, CXCL11, CXCL10                                               | 93 | 122  | 16792 | 5.919971796 | 1        | 0.640349 | 35.7842  | Y |
| GOTERM_BP_DIRECT | GO:0007267~cell-cell signaling                                                    | 5  | 5.154639175 | 0.050922395 | TNFSF10, CXCL9, CCL5, CXCL11, CXCL10                                      | 93 | 254  | 16792 | 3.554313775 | 1        | 0.800063 | 53.91534 | Y |
| GOTERM_BP_DIRECT | GO:0032496~response to lipopolysaccharide                                         | 4  | 4.12371134  | 0.061223809 | CXCL9, IDO1, CXCL11, CXCL10                                               | 93 | 164  | 16792 | 4.403881458 | 1        | 0.829495 | 60.79846 | Y |
| UP_KEYWORDS      | Chemotaxis                                                                        | 3  | 3.092783505 | 0.075399036 | CCL5, CXCL11, CXCL10                                                      | 97 | 97   | 20581 | 6.562121373 | 1        | 0.476697 | 62.25504 | Y |
| GOTERM_BP_DIRECT | GO:0042127~regulation of cell proliferation                                       | 4  | 4.12371134  | 0.081283224 | CXCL9, TXK, CXCL11, CXCL10                                                | 93 | 185  | 16792 | 3.903981401 | 1        | 0.876179 | 71.53819 | Y |
| KEGG_PATHWAY     | hsa04060:Cytokine-cytokine receptor interaction                                   | 5  | 5.154639175 | 0.088308797 | TNFSF10, CXCL9, CCL5, CXCL11, CXCL10                                      | 49 | 243  | 6879  | 2.888636936 | 0.999707 | 0.742308 | 63.26437 | Y |
| GOTERM_BP_DIRECT | GO:0007165~signal transduction                                                    | 10 | 10.30927835 | 0.184740346 | APOL3, CD38, TNFSF10, LYN, IGF2R, CXCL9, ARHGAP27, CHRNBI, CXCL11, CXCL10 | 93 | 1161 | 16792 | 1.555203616 | 1        | 0.986944 | 95.15615 | Y |
| GOTERM_CC_DIRECT | GO:0005576~extracellular region                                                   | 9  | 9.278350515 | 0.597232544 | APOL3, C1QB, TNFSF10, CXCL9, PLA1A, C17ORF67, CCL5, CXCL11, CXCL10        | 95 | 1610 | 18224 | 1.072350441 | 1        | 0.997865 | 99.99787 | Y |
| UP_KEYWORDS      | Secreted                                                                          | 9  | 9.278350515 | 0.708021223 | C1QB, CXCL9, PLA1A, FGL2, C17ORF67, CCL5, CXCL11, CEACAM1, CXCL10         | 97 | 1965 | 20581 | 0.971795074 | 1        | 0.984653 | 99.99998 | N |
| GOTERM_BP_DIRECT | GO:0007186~G-protein coupled receptor signaling pathway                           | 5  | 5.154639175 | 0.732755597 | IGF2R, CXCL9, CCL5, CXCL11, CXCL10                                        | 93 | 899  | 16792 | 1.004222135 | 1        | 1        | 100      | Y |
| GOTERM_CC_DIRECT | GO:0005615~extracellular space                                                    | 6  | 6.18556701  | 0.83334371  | TNFSF10, IGF2R, CXCL9, CCL5, CXCL11, CXCL10                               | 95 | 1347 | 18224 | 0.854483648 | 1        | 0.999975 | 100      | Y |

|                      |                                          |       |            |             |                                          |            |          |           |                 |            |           |          |                |
|----------------------|------------------------------------------|-------|------------|-------------|------------------------------------------|------------|----------|-----------|-----------------|------------|-----------|----------|----------------|
| Annotation Cluster 3 | Enrichment Score: 1.726064817187307      |       |            |             |                                          |            |          |           |                 |            |           |          |                |
| Category             | Term                                     | Count | %          | PValue      | Genes                                    | List Total | Pop Hits | Pop Total | Fold Enrichment | Bonferroni | Benjamini | FDR      | Supported term |
| INTERPRO             | IPR011990:Tetratricopeptide-like helical | 6     | 6.18556701 | 0.004593298 | IFIT3, IFIT2, IFIT1, CSTF3, UTP6, TOMM34 | 93         | 218      | 18559     | 5.492453389     | 0.712822   | 0.340243  | 5.876951 | N              |
| UP_SEQ_FEATURE       | repeat:TPR 6                             | 4     | 4.12371134 | 0.004609097 | IFIT3, IFIT2, IFIT1, TOMM34              | 97         | 70       | 20063     | 11.8191458      | 0.780253   | 0.780253  | 6.065579 | N              |
| UP_SEQ_FEATURE       | repeat:TPR 5                             | 4     | 4.12371134 | 0.006232016 | IFIT3, IFIT2, IFIT1, TOMM34              | 97         | 78       | 20063     | 10.60692572     | 0.871329   | 0.641293  | 8.118925 | N              |
| UP_SEQ_FEATURE       | repeat:TPR 4                             | 4     | 4.12371134 | 0.012285368 | IFIT3, IFIT2, IFIT1, TOMM34              | 97         | 100      | 20063     | 8.273402062     | 0.982657   | 0.637104  | 15.41664 | N              |

|                      |                                                      |       |             |             |                                                                                                 |            |          |           |                 |            |           |          |                |
|----------------------|------------------------------------------------------|-------|-------------|-------------|-------------------------------------------------------------------------------------------------|------------|----------|-----------|-----------------|------------|-----------|----------|----------------|
| SMART                | SM00028:TPR                                          | 4     | 4.12371134  | 0.024400656 | IFIT3, IFIT2, IFIT1, TOMM34                                                                     | 49         | 131      | 10057     | 6.267019785     | 0.716308   | 0.467373  | 21.25684 | N              |
| INTERPRO             | IPR013026:Tetratricopeptide repeat-containing domain | 4     | 4.12371134  | 0.027919841 | IFIT3, IFIT2, IFIT1, TOMM34                                                                     | 93         | 132      | 18559     | 6.04724666      | 0.999535   | 0.784497  | 31.10109 | N              |
| INTERPRO             | IPR019734:Tetratricopeptide repeat                   | 4     | 4.12371134  | 0.031270632 | IFIT3, IFIT2, IFIT1, TOMM34                                                                     | 93         | 138      | 18559     | 5.784322892     | 0.999818   | 0.761872  | 34.1609  | N              |
| UP_SEQ_FEATURE       | repeat:TPR 3                                         | 4     | 4.12371134  | 0.035345375 | IFIT3, IFIT2, IFIT1, TOMM34                                                                     | 97         | 150      | 20063     | 5.515601375     | 0.999993   | 0.86015   | 38.57843 | N              |
| UP_KEYWORDS          | TPR repeat                                           | 4     | 4.12371134  | 0.0433565   | IFIT3, IFIT2, IFIT1, TOMM34                                                                     | 97         | 167      | 20581     | 5.082042101     | 0.99978    | 0.35805   | 42.3565  | N              |
| UP_SEQ_FEATURE       | repeat:TPR 1                                         | 4     | 4.12371134  | 0.044141384 | IFIT3, IFIT2, IFIT1, TOMM34                                                                     | 97         | 164      | 20063     | 5.044757355     | 1          | 0.879412  | 45.7453  | N              |
| UP_SEQ_FEATURE       | repeat:TPR 2                                         | 4     | 4.12371134  | 0.044141384 | IFIT3, IFIT2, IFIT1, TOMM34                                                                     | 97         | 164      | 20063     | 5.044757355     | 1          | 0.879412  | 45.7453  | N              |
| Annotation Cluster 4 | Enrichment Score: 1.6502949968446308                 |       |             |             |                                                                                                 |            |          |           |                 |            |           |          |                |
| Category             | Term                                                 | Count | %           | PValue      | Genes                                                                                           | List Total | Pop Hits | Pop Total | Fold Enrichment | Bonferroni | Benjamini | FDR      | Supported term |
| UP_SEQ_FEATURE       | domain:SH2                                           | 4     | 4.12371134  | 0.011004845 | LYN, TXK, STAT1, HSH2D                                                                          | 97         | 96       | 20063     | 8.618127148     | 0.973473   | 0.701763  | 13.91921 | N              |
| UP_KEYWORDS          | SH2 domain                                           | 4     | 4.12371134  | 0.014108943 | LYN, TXK, STAT1, HSH2D                                                                          | 97         | 108      | 20581     | 7.858342879     | 0.93278    | 0.217636  | 16.18881 | N              |
| INTERPRO             | IPR000980:SH2 domain                                 | 4     | 4.12371134  | 0.018652132 | LYN, TXK, STAT1, HSH2D                                                                          | 93         | 113      | 18559     | 7.064040346     | 0.993918   | 0.720741  | 21.94052 | N              |
| SMART                | SM00252:SH2                                          | 3     | 3.092783505 | 0.086499402 | LYN, TXK, HSH2D                                                                                 | 49         | 103      | 10057     | 5.978006737     | 0.990088   | 0.785192  | 58.32279 | N              |
| Annotation Cluster 5 | Enrichment Score: 1.5911736534355603                 |       |             |             |                                                                                                 |            |          |           |                 |            |           |          |                |
| Category             | Term                                                 | Count | %           | PValue      | Genes                                                                                           | List Total | Pop Hits | Pop Total | Fold Enrichment | Bonferroni | Benjamini | FDR      | Supported term |
| UP_KEYWORDS          | Endoplasmic reticulum                                | 13    | 13.40206186 | 0.003984849 | TMEM97, CYP51A1, CKAP4, RSAD2, TLR7, IFIT2, CYP7B1, ACSL1, STX17, CLEC2D, POMP, UGGT2, C19ORF12 | 97         | 1067     | 20581     | 2.585078117     | 0.531694   | 0.10271   | 4.841396 | N              |
| GOTERM_CC_DIRECT     | GO:0005783~endoplasmic reticulum                     | 10    | 10.30927835 | 0.026960304 | IFIT2, CYP51A1, CKAP4, POMP, CLEC2D, RSAD2, UGGT2, C19ORF12, TLR7, EHD4                         | 95         | 828      | 18224     | 2.316806509     | 0.979368   | 0.621004  | 27.62243 | N              |
| GOTERM_CC_DIRECT     | GO:0005789~endoplasmic reticulum membrane            | 8     | 8.24742268  | 0.156798661 | CYP7B1, ACSL1, CYP51A1, STX17, CKAP4, RSAD2, C19ORF12, TLR7                                     | 95         | 862      | 18224     | 1.78033948      | 1          | 0.867101  | 86.69886 | N              |
| Annotation Cluster 6 | Enrichment Score: 1.5864527768136467                 |       |             |             |                                                                                                 |            |          |           |                 |            |           |          |                |
| Category             | Term                                                 | Count | %           | PValue      | Genes                                                                                           | List Total | Pop Hits | Pop Total | Fold Enrichment | Bonferroni | Benjamini | FDR      | Supported term |
| GOTERM_CC_DIRECT     | GO:0005741~mitochondrial outer membrane              | 5     | 5.154639175 | 0.007411029 | IFI27, ACSL1, TOMM5, RSAD2, TOMM34                                                              | 95         | 149      | 18224     | 6.437301307     | 0.652255   | 0.652255  | 8.422697 | N              |
| UP_KEYWORDS          | Mitochondrion outer membrane                         | 4     | 4.12371134  | 0.015543251 | ACSL1, TOMM5, RSAD2, TOMM34                                                                     | 97         | 112      | 20581     | 7.577687776     | 0.949024   | 0.219667  | 17.69172 | N              |
| UP_KEYWORDS          | Mitochondrion                                        | 9     | 9.278350515 | 0.151084967 | ISCA1, IFIT3, IFI27, ACSL1, L2HGDH, TOMM5, RSAD2, C19ORF12, TOMM34                              | 97         | 1119     | 20581     | 1.706503413     | 1          | 0.712016  | 86.94192 | N              |
| Annotation Cluster 7 | Enrichment Score: 1.3600952718144812                 |       |             |             |                                                                                                 |            |          |           |                 |            |           |          |                |
| Category             | Term                                                 | Count | %           | PValue      | Genes                                                                                           | List Total | Pop Hits | Pop Total | Fold Enrichment | Bonferroni | Benjamini | FDR      | Supported term |
| UP_KEYWORDS          | Cholesterol metabolism                               | 3     | 3.092783505 | 0.029104349 | CYP7B1, CYP51A1, HMGCS1                                                                         | 97         | 57       | 20581     | 11.16711883     | 0.996346   | 0.281156  | 30.72566 | N              |
| UP_KEYWORDS          | Sterol metabolism                                    | 3     | 3.092783505 | 0.039133431 | CYP7B1, CYP51A1, HMGCS1                                                                         | 97         | 67       | 20581     | 9.500384675     | 0.999492   | 0.343856  | 39.11283 | N              |
| UP_KEYWORDS          | Lipid metabolism                                     | 6     | 6.18556701  | 0.052091671 | CYP7B1, ACSL1, CYP51A1, HRASLS2, HMGCS1, PLA1A                                                  | 97         | 433      | 20581     | 2.940072855     | 0.999961   | 0.398438  | 48.56754 | N              |
| UP_KEYWORDS          | Steroid metabolism                                   | 3     | 3.092783505 | 0.061142726 | CYP7B1, CYP51A1, HMGCS1                                                                         | 97         | 86       | 20581     | 7.401462479     | 0.999994   | 0.434944  | 54.34902 | N              |
| Annotation Cluster 8 | Enrichment Score: 0.764864166314791                  |       |             |             |                                                                                                 |            |          |           |                 |            |           |          |                |
| Category             | Term                                                 | Count | %           | PValue      | Genes                                                                                           | List Total | Pop Hits | Pop Total | Fold Enrichment | Bonferroni | Benjamini | FDR      | Supported term |
| GOTERM_CC_DIRECT     | GO:0005769~early endosome                            | 4     | 4.12371134  | 0.114883283 | WDFY2, RAB31, IGF2R, MVB12B                                                                     | 95         | 229      | 18224     | 3.350769938     | 1          | 0.88538   | 76.38959 | Y              |

|              |                      |   |             |             |                                  |    |     |       |             |   |          |          |   |
|--------------|----------------------|---|-------------|-------------|----------------------------------|----|-----|-------|-------------|---|----------|----------|---|
| UP_KEYWORDS  | Endosome             | 5 | 5.154639175 | 0.187118454 | WDFY2, RAB31, TLR7, EHD4, MVB12B | 97 | 481 | 20581 | 2.20556401  | 1 | 0.754828 | 92.38339 | Y |
| KEGG_PATHWAY | hsa04144:Endocytosis | 4 | 4.12371134  | 0.236066326 | RAB31, IGF2R, EHD4, MVB12B       | 49 | 241 | 6879  | 2.330087222 | 1 | 0.948286 | 94.58863 | Y |

|                       |                                                |       |             |             |                                                                                   |            |          |           |                 |            |           |          |                |
|-----------------------|------------------------------------------------|-------|-------------|-------------|-----------------------------------------------------------------------------------|------------|----------|-----------|-----------------|------------|-----------|----------|----------------|
| Annotation Cluster 9  | Enrichment Score: 0.6785228070367667           |       |             |             |                                                                                   |            |          |           |                 |            |           |          |                |
| Category              | Term                                           | Count | %           | PValue      | Genes                                                                             | List Total | Pop Hits | Pop Total | Fold Enrichment | Bonferroni | Benjamini | FDR      | Supported term |
| GOTERM_MF_DIRECT      | GO:0003723~RNA binding                         | 8     | 8.24742268  | 0.025378645 | IFIT3, IFIT2, IFIT1, CSTF3, RBMS2, APOBEC3G, NXF1, PUS7                           | 90         | 547      | 16881     | 2.743205363     | 0.992996   | 0.71071   | 27.40838 | N              |
| UP_KEYWORDS           | RNA-binding                                    | 6     | 6.18556701  | 0.19916166  | IFIT2, IFIT1, OASL, SRSF4, RBMS2, NXF1                                            | 97         | 665      | 20581     | 1.914363228     | 1          | 0.755027  | 93.67305 | N              |
| INTERPRO              | IPR012677:Nucleotide-binding, alpha-beta plait | 3     | 3.092783505 | 0.377293207 | SRSF4, RBMS2, NXF1                                                                | 93         | 264      | 18559     | 2.267717498     | 1          | 0.999949  | 99.80337 | N              |
| GOTERM_MF_DIRECT      | GO:0044822~poly(A) RNA binding                 | 8     | 8.24742268  | 0.385653015 | IFIT2, OASL, CSTF3, SRSF4, CKAP4, RBMS2, NXF1, PUS7                               | 90         | 1129     | 16881     | 1.329081783     | 1          | 0.999278  | 99.76908 | N              |
| GOTERM_MF_DIRECT      | GO:0000166~nucleotide binding                  | 3     | 3.092783505 | 0.550599843 | SRSF4, RBMS2, NXF1                                                                | 90         | 348      | 16881     | 1.616954023     | 1          | 0.999935  | 99.99531 | N              |
| Annotation Cluster 10 | Enrichment Score: 0.6720478920297307           |       |             |             |                                                                                   |            |          |           |                 |            |           |          |                |
| Category              | Term                                           | Count | %           | PValue      | Genes                                                                             | List Total | Pop Hits | Pop Total | Fold Enrichment | Bonferroni | Benjamini | FDR      | Supported term |
| UP_KEYWORDS           | Iron                                           | 5     | 5.154639175 | 0.06512329  | ISCA1, CYP7B1, CYP51A1, RSAD2, IDO1                                               | 97         | 324      | 20581     | 3.274309533     | 0.999997   | 0.440984  | 56.69716 | N              |
| UP_KEYWORDS           | Heme                                           | 3     | 3.092783505 | 0.12638324  | CYP7B1, CYP51A1, IDO1                                                             | 97         | 132      | 20581     | 4.822164948     | 1          | 0.656871  | 81.34911 | N              |
| GOTERM_MF_DIRECT      | GO:0020037~heme binding                        | 3     | 3.092783505 | 0.162922085 | CYP7B1, CYP51A1, IDO1                                                             | 90         | 137      | 16881     | 4.10729927      | 1          | 0.967687  | 89.09565 | N              |
| UP_KEYWORDS           | Oxidoreductase                                 | 4     | 4.12371134  | 0.512878622 | CYP7B1, L2HGDH, CYP51A1, IDO1                                                     | 97         | 582      | 20581     | 1.458249194     | 1          | 0.945392  | 99.98689 | N              |
| GOTERM_BP_DIRECT      | GO:0055114~oxidation-reduction process         | 4     | 4.12371134  | 0.634366388 | CYP7B1, L2HGDH, CYP51A1, IDO1                                                     | 93         | 592      | 16792     | 1.219994188     | 1          | 1         | 99.99997 | N              |
| Annotation Cluster 11 | Enrichment Score: 0.5991738374808624           |       |             |             |                                                                                   |            |          |           |                 |            |           |          |                |
| Category              | Term                                           | Count | %           | PValue      | Genes                                                                             | List Total | Pop Hits | Pop Total | Fold Enrichment | Bonferroni | Benjamini | FDR      | Supported term |
| UP_SEQ_FEATURE        | domain:SH3                                     | 3     | 3.092783505 | 0.204284324 | LYN, ARHGAP27, TXK                                                                | 97         | 175      | 20063     | 3.545743741     | 1          | 0.998902  | 95.47319 | N              |
| UP_KEYWORDS           | SH3 domain                                     | 3     | 3.092783505 | 0.265290687 | LYN, ARHGAP27, TXK                                                                | 97         | 215      | 20581     | 2.960584992     | 1          | 0.821424  | 97.8323  | N              |
| INTERPRO              | IPR001452:Src homology-3 domain                | 3     | 3.092783505 | 0.294117889 | LYN, ARHGAP27, TXK                                                                | 93         | 218      | 18559     | 2.746226694     | 1          | 0.999616  | 98.97678 | N              |
| Annotation Cluster 12 | Enrichment Score: 0.5300377601596119           |       |             |             |                                                                                   |            |          |           |                 |            |           |          |                |
| Category              | Term                                           | Count | %           | PValue      | Genes                                                                             | List Total | Pop Hits | Pop Total | Fold Enrichment | Bonferroni | Benjamini | FDR      | Supported term |
| GOTERM_MF_DIRECT      | GO:0005524~ATP binding                         | 13    | 13.40206186 | 0.093019135 | WARS, ALPK1, OASL, ACSL1, SBK1, LYN, SLFN12, HARS, TXK, MASTL, SCYL3, RUNX3, EHD4 | 90         | 1495     | 16881     | 1.631014493     | 1          | 0.932248  | 70.37639 | N              |
| GOTERM_BP_DIRECT      | GO:0006468~protein phosphorylation             | 6     | 6.18556701  | 0.105264314 | ALPK1, SBK1, LYN, TXK, SCYL3, RUNX3                                               | 93         | 456      | 16792     | 2.375778155     | 1          | 0.913446  | 80.76913 | N              |
| INTERPRO              | IPR011009:Protein kinase-like domain           | 6     | 6.18556701  | 0.123798743 | ALPK1, SBK1, LYN, TXK, MASTL, SCYL3                                               | 93         | 531      | 18559     | 2.254905534     | 1          | 0.988631  | 82.42424 | N              |
| GOTERM_MF_DIRECT      | GO:0016301~kinase activity                     | 4     | 4.12371134  | 0.134527416 | ALPK1, TXK, MASTL, SCYL3                                                          | 90         | 241      | 16881     | 3.113139696     | 1          | 0.954873  | 83.47562 | N              |
| UP_SEQ_FEATURE        | domain:Protein kinase                          | 5     | 5.154639175 | 0.195931658 | SBK1, LYN, TXK, MASTL, SCYL3                                                      | 97         | 478      | 20063     | 2.163546564     | 1          | 0.999217  | 94.78543 | N              |
| INTERPRO              | IPR000719:Protein kinase, catalytic domain     | 5     | 5.154639175 | 0.222255613 | SBK1, LYN, TXK, MASTL, SCYL3                                                      | 93         | 487      | 18559     | 2.048861805     | 1          | 0.998899  | 96.33661 | N              |

|                       |                                                     |                                      |             |             |                                                                         |            |          |           |                 |            |           |          |                |
|-----------------------|-----------------------------------------------------|--------------------------------------|-------------|-------------|-------------------------------------------------------------------------|------------|----------|-----------|-----------------|------------|-----------|----------|----------------|
| UP_KEYWORDS           | Transferase                                         | 11                                   | 11.34020619 | 0.273225166 | CD38, ALPK1, SBK1, LYN, HRASLS2, HMGCS1, PAPD7, QPRT, TXK, MASTL, UGGT2 | 97         | 1708     | 20581     | 1.366468288     | 1          | 0.814434  | 98.10596 | N              |
| UP_SEQ_FEATURE        | binding site:ATP                                    | 5                                    | 5.154639175 | 0.278065357 | SBK1, LYN, TXK, MASTL, EHD4                                             | 97         | 558      | 20063     | 1.853360677     | 1          | 0.999731  | 98.78831 | N              |
| UP_SEQ_FEATURE        | active site:Proton acceptor                         | 5                                    | 5.154639175 | 0.40182422  | SBK1, LYN, CNDP2, TXK, MASTL                                            | 97         | 672      | 20063     | 1.538951276     | 1          | 0.999994  | 99.90511 | N              |
| UP_KEYWORDS           | Kinase                                              | 5                                    | 5.154639175 | 0.449736135 | ALPK1, SBK1, LYN, TXK, MASTL                                            | 97         | 735      | 20581     | 1.4433691       | 1          | 0.928602  | 99.94034 | N              |
| UP_KEYWORDS           | ATP-binding                                         | 8                                    | 8.24742268  | 0.474474458 | WARS, ACSL1, SBK1, LYN, HARS, TXK, MASTL, EHD4                          | 97         | 1391     | 20581     | 1.220274667     | 1          | 0.933887  | 99.96632 | N              |
| SMART                 | SM00220:S_TKc                                       | 3                                    | 3.092783505 | 0.515431182 | SBK1, MASTL, SCYL3                                                      | 49         | 359      | 10057     | 1.715138423     | 1          | 0.999903  | 99.90961 | N              |
| UP_KEYWORDS           | Serine/threonine-protein kinase                     | 3                                    | 3.092783505 | 0.549871202 | ALPK1, SBK1, MASTL                                                      | 97         | 393      | 20581     | 1.619658456     | 1          | 0.954732  | 99.99509 | N              |
| GOTERM_MF_DIRECT      | GO:0004674~protein serine/threonine kinase activity | 3                                    | 3.092783505 | 0.592916928 | ALPK1, SBK1, MASTL                                                      | 90         | 376      | 16881     | 1.496542553     | 1          | 0.999829  | 99.99863 | N              |
| UP_KEYWORDS           | Nucleotide-binding                                  | 9                                    | 9.278350515 | 0.601987687 | WARS, RAB31, ACSL1, SBK1, LYN, HARS, TXK, MASTL, EHD4                   | 97         | 1788     | 20581     | 1.067996264     | 1          | 0.963215  | 99.99894 | N              |
| UP_SEQ_FEATURE        | nucleotide phosphate-binding region:ATP             | 5                                    | 5.154639175 | 0.706594986 | SBK1, LYN, TXK, MASTL, EHD4                                             | 97         | 994      | 20063     | 1.040417764     | 1          | 1         | 99.99999 | N              |
| Annotation Cluster 13 |                                                     | Enrichment Score: 0.4572345744164589 |             |             |                                                                         |            |          |           |                 |            |           |          |                |
| Category              | Term                                                | Count                                | %           | PValue      | Genes                                                                   | List Total | Pop Hits | Pop Total | Fold Enrichment | Bonferroni | Benjamini | FDR      | Supported term |
| UP_SEQ_FEATURE        | region of interest:Substrate binding                | 3                                    | 3.092783505 | 0.130092787 | CNDP2, QPRT, GAD1                                                       | 97         | 131      | 20063     | 4.73668057      | 1          | 0.993775  | 84.85822 | N              |
| UP_SEQ_FEATURE        | binding site:Substrate                              | 3                                    | 3.092783505 | 0.423470932 | CNDP2, QPRT, GAD1                                                       | 97         | 301      | 20063     | 2.061478919     | 1          | 0.999988  | 99.9424  | N              |
| KEGG_PATHWAY          | hsa01100:Metabolic pathways                         | 8                                    | 8.24742268  | 0.771293113 | CD38, ACSL1, CNDP2, CYP51A1, HMGCS1, QPRT, IDO1, GAD1                   | 49         | 1219     | 6879      | 0.921330632     | 1          | 0.999998  | 99.99999 | N              |
| Annotation Cluster 14 |                                                     | Enrichment Score: 0.439604008162174  |             |             |                                                                         |            |          |           |                 |            |           |          |                |
| Category              | Term                                                | Count                                | %           | PValue      | Genes                                                                   | List Total | Pop Hits | Pop Total | Fold Enrichment | Bonferroni | Benjamini | FDR      | Supported term |
| UP_KEYWORDS           | Cell division                                       | 4                                    | 4.12371134  | 0.271382002 | PAPD7, PELO, MASTL, SYCP1                                               | 97         | 388      | 20581     | 2.187373791     | 1          | 0.820704  | 98.04538 | N              |
| GOTERM_BP_DIRECT      | GO:0051301~cell division                            | 4                                    | 4.12371134  | 0.300703326 | PAPD7, PELO, MASTL, SYCP1                                               | 93         | 350      | 16792     | 2.063533026     | 1          | 0.99874   | 99.50168 | N              |
| UP_KEYWORDS           | Cell cycle                                          | 4                                    | 4.12371134  | 0.588123729 | PAPD7, PELO, MASTL, SYCP1                                               | 97         | 650      | 20581     | 1.305693894     | 1          | 0.960878  | 99.99837 | N              |
| Annotation Cluster 15 |                                                     | Enrichment Score: 0.2837840902373059 |             |             |                                                                         |            |          |           |                 |            |           |          |                |
| Category              | Term                                                | Count                                | %           | PValue      | Genes                                                                   | List Total | Pop Hits | Pop Total | Fold Enrichment | Bonferroni | Benjamini | FDR      | Supported term |
| INTERPRO              | IPR011011:Zinc finger, FYVE/PHD-type                | 3                                    | 3.092783505 | 0.154773302 | WDFY2, SP100, SP140                                                     | 93         | 141      | 18559     | 4.245939144     | 1          | 0.993675  | 89.05333 | N              |
| INTERPRO              | IPR013083:Zinc finger, RING/FYVE/PHD-type           | 4                                    | 4.12371134  | 0.390436235 | WDFY2, RNF114, SP100, SP140                                             | 93         | 453      | 18559     | 1.762111161     | 1          | 0.999931  | 99.85148 | N              |
| GOTERM_MF_DIRECT      | GO:0008270~zinc ion binding                         | 6                                    | 6.18556701  | 0.74671981  | RNF114, SP100, CNDP2, MT2A, APOBEC3G, SP140                             | 90         | 1169     | 16881     | 0.962703165     | 1          | 0.999997  | 100      | N              |
| UP_KEYWORDS           | Zinc                                                | 9                                    | 9.278350515 | 0.869682684 | WDFY2, RNF114, TNFSF10, SP100, MT2A, APOBEC3G, ADAM19, ZNF438, SP140    | 97         | 2348     | 20581     | 0.813278245     | 1          | 0.996633  | 100      | N              |
| UP_KEYWORDS           | Zinc-finger                                         | 5                                    | 5.154639175 | 0.971213901 | WDFY2, RNF114, SP100, ZNF438, SP140                                     | 97         | 1781     | 20581     | 0.595663273     | 1          | 0.999889  | 100      | N              |
| Annotation Cluster 16 |                                                     | Enrichment Score: 0.200404067676772  |             |             |                                                                         |            |          |           |                 |            |           |          |                |
| Category              | Term                                                | Count                                | %           | PValue      | Genes                                                                   | List Total | Pop Hits | Pop Total | Fold Enrichment | Bonferroni | Benjamini | FDR      | Supported term |

|                  |                                                  |    |             |             |                                                                                                                                                                                                                                                                                                |    |      |       |             |   |          |          |   |
|------------------|--------------------------------------------------|----|-------------|-------------|------------------------------------------------------------------------------------------------------------------------------------------------------------------------------------------------------------------------------------------------------------------------------------------------|----|------|-------|-------------|---|----------|----------|---|
| UP_KEYWORDS      | Signal                                           | 23 | 23.71134021 | 0.290640196 | CYP51A1, CXCL9, C17ORF67, CXCL11, CCL5, TLR7, CXCL10, APOL3, C1QB, N4BP2L2, IFI27, TOMM5, IGF2R, CLEC2D, LILRA6, PLA1A, QPRT, FGL2, ADAM19, CHRN1, SLC31A2, UGGT2, CEACAM1                                                                                                                     | 97 | 4160 | 20581 | 1.173084358 | 1 | 0.828533 | 98.59888 | N |
| UP_KEYWORDS      | Membrane                                         | 38 | 39.17525773 | 0.368210272 | SLC38A5, RTP4, IFITM1, IFITM2, CYP51A1, RSAD2, TLR7, SFT2D2, ACSL1, TOMM5, STX17, CLEC2D, LILRA6, EFR3A, SLC31A2, CEACAM1, MVB12B, TOMM34, EHD4, TMEM97, LYN, HRASLS2, CKAP4, TSPAN13, ARHGAP27, ELMO2, CYP7B1, CD38, RAB31, TNFSF10, IFI27, NUP205, IGF2R, POMP, TXK, ADAM19, CHRN1, C19ORF12 | 97 | 7494 | 20581 | 1.075882011 | 1 | 0.887093 | 99.66781 | N |
| GOTERM_CC_DIRECT | GO:0016021~integral component of membrane        | 29 | 29.89690722 | 0.414855311 | SLC38A5, RTP4, IFITM1, CYP51A1, IFITM2, TLR7, SFT2D2, ACSL1, TOMM5, STX17, CLEC2D, LILRA6, SLC31A2, CEACAM1, TOMM34, TMEM97, HRASLS2, CKAP4, TSPAN13, ELMO2, CYP7B1, CD38, TNFSF10, IFI27, L2HGDH, IGF2R, ADAM19, CHRN1, C19ORF12                                                              | 95 | 5163 | 18224 | 1.077496763 | 1 | 0.988625 | 99.82335 | N |
| GOTERM_CC_DIRECT | GO:0005887~integral component of plasma membrane | 9  | 9.278350515 | 0.447522146 | SLC38A5, TNFSF10, IGF2R, CLEC2D, TSPAN13, CHRN1, SLC31A2, TLR7, CEACAM1                                                                                                                                                                                                                        | 95 | 1415 | 18224 | 1.220130184 | 1 | 0.990728 | 99.91046 | N |
| UP_KEYWORDS      | Transmembrane helix                              | 27 | 27.83505155 | 0.56434991  | SLC38A5, RTP4, IFITM1, CYP51A1, IFITM2, TLR7, SFT2D2, ACSL1, TOMM5, STX17, LILRA6, CLEC2D, SLC31A2, CEACAM1, TMEM97, HRASLS2, CKAP4, TSPAN13, ELMO2, CYP7B1, CD38, TNFSF10, IFI27, IGF2R, ADAM19, CHRN1, C19ORF12                                                                              | 97 | 5634 | 20581 | 1.016814334 | 1 | 0.957467 | 99.99673 | N |
| UP_KEYWORDS      | Transmembrane                                    | 27 | 27.83505155 | 0.571498282 | SLC38A5, RTP4, IFITM1, CYP51A1, IFITM2, TLR7, SFT2D2, ACSL1, TOMM5, STX17, LILRA6, CLEC2D, SLC31A2, CEACAM1, TMEM97, HRASLS2, CKAP4, TSPAN13, ELMO2, CYP7B1, CD38, TNFSF10, IFI27, IGF2R, ADAM19, CHRN1, C19ORF12                                                                              | 97 | 5651 | 20581 | 1.013755434 | 1 | 0.957456 | 99.99734 | N |

|                       |                                         |       |             |             |                                                                                                                                                                                           |            |          |           |                 |            |           |          |                |
|-----------------------|-----------------------------------------|-------|-------------|-------------|-------------------------------------------------------------------------------------------------------------------------------------------------------------------------------------------|------------|----------|-----------|-----------------|------------|-----------|----------|----------------|
| UP_SEQ_FEATURE        | transmembrane region                    | 24    | 24.74226804 | 0.648805535 | SLC38A5, TMEM97, RTP4, IFITM1, CYP51A1, IFITM2, CKAP4, TSPAN13, TLR7, SFT2D2, CD38, TNFSF10, IFI27, ACSL1, TOMM5, IGF2R, STX17, CLEC2D, LILRA6, ADAM19, CHRN1, SLC31A2, C19ORF12, CEACAM1 | 97         | 5056     | 20063     | 0.981811954     | 1          | 1         | 99.99993 | N              |
| UP_SEQ_FEATURE        | disulfide bond                          | 14    | 14.43298969 | 0.653278776 | CXCL9, CXCL11, CCL5, CXCL10, C1QB, CD38, IGF2R, LILRA6, CLEC2D, PLA1A, FGL2, ADAM19, CHRN1, CEACAM1                                                                                       | 97         | 2917     | 20063     | 0.992694797     | 1          | 1         | 99.99994 | N              |
| UP_SEQ_FEATURE        | topological domain:Cytoplasmic          | 16    | 16.49484536 | 0.702179082 | SLC38A5, TMEM97, RTP4, TSPAN13, TLR7, SFT2D2, CD38, TNFSF10, ACSL1, STX17, IGF2R, LILRA6, CLEC2D, ADAM19, CHRN1, CEACAM1                                                                  | 97         | 3456     | 20063     | 0.957569683     | 1          | 1         | 99.99999 | N              |
| UP_KEYWORDS           | Secreted                                | 9     | 9.278350515 | 0.708021223 | C1QB, CXCL9, PLA1A, FGL2, C17ORF67, CCL5, CXCL11, CEACAM1, CXCL10                                                                                                                         | 97         | 1965     | 20581     | 0.971795074     | 1          | 0.984653  | 99.99998 | N              |
| UP_SEQ_FEATURE        | signal peptide                          | 15    | 15.46391753 | 0.749396919 | CXCL9, C17ORF67, CXCL11, CCL5, TLR7, CXCL10, C1QB, IGF2R, LILRA6, PLA1A, FGL2, ADAM19, CHRN1, UGGT2, CEACAM1                                                                              | 97         | 3346     | 20063     | 0.927234242     | 1          | 1         | 100      | N              |
| UP_KEYWORDS           | Disulfide bond                          | 14    | 14.43298969 | 0.832514371 | CXCL9, CXCL11, CCL5, CXCL10, C1QB, CD38, IGF2R, LILRA6, CLEC2D, PLA1A, FGL2, ADAM19, CHRN1, CEACAM1                                                                                       | 97         | 3434     | 20581     | 0.865012699     | 1          | 0.9937    | 100      | N              |
| UP_SEQ_FEATURE        | topological domain:Extracellular        | 11    | 11.34020619 | 0.874598569 | SLC38A5, TMEM97, CD38, TNFSF10, LILRA6, CLEC2D, TSPAN13, ADAM19, CHRN1, TLR7, CEACAM1                                                                                                     | 97         | 2787     | 20063     | 0.816356501     | 1          | 1         | 100      | N              |
| UP_KEYWORDS           | Receptor                                | 6     | 6.18556701  | 0.891596402 | CD38, IGF2R, LILRA6, CLEC2D, CHRN1, TLR7                                                                                                                                                  | 97         | 1648     | 20581     | 0.772482734     | 1          | 0.997798  | 100      | N              |
| UP_KEYWORDS           | Glycoprotein                            | 16    | 16.49484536 | 0.956117715 | SLC38A5, TSPAN13, CCL5, TLR7, C1QB, CD38, ACSL1, IGF2R, LILRA6, CLEC2D, PLA1A, FGL2, ADAM19, CHRN1, UGGT2, CEACAM1                                                                        | 97         | 4551     | 20581     | 0.745946852     | 1          | 0.999707  | 100      | N              |
| UP_SEQ_FEATURE        | glycosylation site:N-linked (GlcNAc...) | 13    | 13.40206186 | 0.989713353 | SLC38A5, TSPAN13, TLR7, CD38, IGF2R, LILRA6, CLEC2D, PLA1A, FGL2, ADAM19, CHRN1, UGGT2, CEACAM1                                                                                           | 97         | 4234     | 20063     | 0.635062747     | 1          | 1         | 100      | N              |
| Annotation Cluster 17 | Enrichment Score: 0.1458772165296016    |       |             |             |                                                                                                                                                                                           |            |          |           |                 |            |           |          |                |
| Category              | Term                                    | Count | %           | PValue      | Genes                                                                                                                                                                                     | List Total | Pop Hits | Pop Total | Fold Enrichment | Bonferroni | Benjamini | FDR      | Supported term |

|                       |                                                                                          |       |             |             |                                                                                                                                     |            |          |           |                 |            |           |          |                |
|-----------------------|------------------------------------------------------------------------------------------|-------|-------------|-------------|-------------------------------------------------------------------------------------------------------------------------------------|------------|----------|-----------|-----------------|------------|-----------|----------|----------------|
| UP_KEYWORDS           | Metal-binding                                                                            | 18    | 18.55670103 | 0.539736831 | WDFY2, SP100, CNBP2, CYP51A1, PAPD7, RSAD2, APOBEC3G, IDO1, SP140, ISCA1, CYP7B1, RNF114, TNFSF10, MT2A, PELO, ADAM19, ZNF438, EHD4 | 97         | 3640     | 20581     | 1.049218307     | 1          | 0.953648  | 99.99352 | N              |
| GOTERM_MF_DIRECT      | GO:0046872~metal ion binding                                                             | 10    | 10.30927835 | 0.777723949 | WDFY2, RNF114, TNFSF10, MT2A, PAPD7, RSAD2, PELO, ADAM19, IDO1, ZNF438                                                              | 90         | 2069     | 16881     | 0.906557113     | 1          | 0.999994  | 100      | N              |
| UP_KEYWORDS           | Zinc                                                                                     | 9     | 9.278350515 | 0.869682684 | WDFY2, RNF114, TNFSF10, SP100, MT2A, APOBEC3G, ADAM19, ZNF438, SP140                                                                | 97         | 2348     | 20581     | 0.813278245     | 1          | 0.996633  | 100      | N              |
| Annotation Cluster 18 | Enrichment Score: 0.13875287402831288                                                    |       |             |             |                                                                                                                                     |            |          |           |                 |            |           |          |                |
| Category              | Term                                                                                     | Count | %           | PValue      | Genes                                                                                                                               | List Total | Pop Hits | Pop Total | Fold Enrichment | Bonferroni | Benjamini | FDR      | Supported term |
| UP_KEYWORDS           | DNA-binding                                                                              | 11    | 11.34020619 | 0.490202593 | BATF2, SP100, HES4, IRF8, PAPD7, TXK, STAT1, ZNF438, SYCP1, SP140, RUNX3                                                            | 97         | 2050     | 20581     | 1.138501383     | 1          | 0.938138  | 99.97691 | N              |
| GOTERM_MF_DIRECT      | GO:0003677~DNA binding                                                                   | 10    | 10.30927835 | 0.527246079 | OASL, BATF2, SP100, HES4, PAPD7, STAT1, ZNF438, SYCP1, SP140, RUNX3                                                                 | 90         | 1674     | 16881     | 1.120469932     | 1          | 0.999935  | 99.99118 | N              |
| GOTERM_MF_DIRECT      | GO:0000978~RNA polymerase II core promoter proximal region sequence-specific DNA binding | 3     | 3.092783505 | 0.5614578   | BATF2, TXK, STAT1                                                                                                                   | 90         | 355      | 16881     | 1.585070423     | 1          | 0.999914  | 99.99654 | N              |
| GOTERM_MF_DIRECT      | GO:0003700~transcription factor activity, sequence-specific DNA binding                  | 6     | 6.18556701  | 0.577014156 | BATF2, IRF8, STAT1, ZNF438, SP140, RUNX3                                                                                            | 90         | 961      | 16881     | 1.1710718       | 1          | 0.99984   | 99.99779 | N              |
| GOTERM_BP_DIRECT      | GO:0006357~regulation of transcription from RNA polymerase II promoter                   | 3     | 3.092783505 | 0.699948497 | BATF2, TXK, RUNX3                                                                                                                   | 93         | 441      | 16792     | 1.228293468     | 1          | 1         | 100      | N              |
| UP_KEYWORDS           | Activator                                                                                | 3     | 3.092783505 | 0.818396428 | BATF2, STAT1, RUNX3                                                                                                                 | 97         | 661      | 20581     | 0.962973938     | 1          | 0.993683  | 100      | N              |
| UP_KEYWORDS           | Transcription regulation                                                                 | 8     | 8.24742268  | 0.928862457 | BATF2, SP100, HES4, IRF8, TXK, STAT1, ZNF438, RUNX3                                                                                 | 97         | 2332     | 20581     | 0.727873954     | 1          | 0.999152  | 100      | N              |
| UP_KEYWORDS           | Transcription                                                                            | 8     | 8.24742268  | 0.9406177   | BATF2, SP100, HES4, IRF8, TXK, STAT1, ZNF438, RUNX3                                                                                 | 97         | 2398     | 20581     | 0.707840726     | 1          | 0.999419  | 100      | N              |
| GOTERM_BP_DIRECT      | GO:0006351~transcription, DNA-templated                                                  | 6     | 6.18556701  | 0.986410203 | BATF2, SP100, HES4, IRF8, STAT1, ZNF438                                                                                             | 93         | 1955     | 16792     | 0.554145698     | 1          | 1         | 100      | N              |
| GOTERM_BP_DIRECT      | GO:0006355~regulation of transcription, DNA-templated                                    | 4     | 4.12371134  | 0.991121247 | HES4, ZNF438, SP140, RUNX3                                                                                                          | 93         | 1504     | 16792     | 0.480210478     | 1          | 1         | 100      | N              |
