# Supplementary material for: HIR V2: a human interactome resource for the biological interpretation of differentially expressed genes via gene set linkage analysis
Source: Oxford University Press journal article supplement (doi:10.1093/database/baab009), 2021-01-01
Supplement: baab009_supp.zip [file baab009_supp.zip]

**Table S7. Annotations produced by the HIR V2/GSLA for downregulated genes.**

Job Number: GSLA11042831061795

Cutoff used:

Q1: density  $\geq 0.01$

Q2:  $p \leq 0.0005$

Meaning:

Q1: inter-geneset interaction density is greater than expected.

Q2: the observed interaction density can only be observed in the biologically correct interactome topology.

Categories selected: GO biological process

Species: Homo sapiens

Interaction dataset selected: HIR2.0

#Subjob Number: GSLA11042831061795\_0

#Description: #top100-down

#Quaried GeneSet: MVB12B, EHD4, APOL3, IRF8, CXCL11, L2HGDH, TLR7, CXCL9, TOMM5, CXCL10, STX17, POMP, CLUAP1, C21orf91, UTP6, TOMM34, SLC31A2, C19orf12, NXF1, WARS, SYCP1, ISCA1, ARHGAP27, PAPD7, TXK, TNFSF10, CYP51A1, SLC38A5, WARS, RNF114, ALPK1, CYP7B1, GAD1, RAB31, HES4, ADAM19, HARS, WDFY2, SP100, CNDP2, C1QB, MASTL, HRASLS2, IGF2R, SLFN12, PELO, IFIT2, SFT2D2, CSTF3, PUS7, HMGCS1, RTP4, PLA1A, SBK1, SRSF4, ISCA1, RGL1, IFIT3, UGGT2, OASL, IFITM2, CD38, LILRA6, IFITM1, BATF2, DOPEY1, CSTF3, TSPAN13, PSMB10, C17orf67, IFIT1, RBMS2, IFI27, SCYL3, CKAP4, CEACAM1, HSH2D, NUP205, ZNF438, MT2A, LYN, CHRN1, ELMO2, ACSL1, STAT1, FAM111A, CCL5, IDO1, RSAD2, FGL2, SP140, EFR3A, CGNL1, N4BP2L2, CLEC2D, KPNA5, RUNX3, TMEM97, QPRT, APOBEC3G

| Term type             | Term       | Description                                                          | Term size | P-value  | Density | Interaction number | Overlap gene number | Overlap gene(s) | Interactions                                                                                                                                                                                                                                                                                                                                                                                                     | Supported term |
|-----------------------|------------|----------------------------------------------------------------------|-----------|----------|---------|--------------------|---------------------|-----------------|------------------------------------------------------------------------------------------------------------------------------------------------------------------------------------------------------------------------------------------------------------------------------------------------------------------------------------------------------------------------------------------------------------------|----------------|
| GO biological process | GO:0043631 | RNA polyadenylation                                                  | 17        | 3.00E-04 | 0.0103  | 17                 | 1                   | CSTF3           | LYN-HGNC:620 STAT1-HGNC:23166 IFIT3-HGNC:23166 SRSF4-HGNC:26184 SRSF4-HGNC:8554 PAPD7-HGNC:25016 PAPD7-HGNC:26184 PAPD7-HGNC:8554 PAPD7-HGNC:25532 PAPD7-HGNC:26776 PAPD7-HGNC:14981 PAPD7-HGNC:14982 PAPD7-HGNC:30401 CSTF3-HGNC:26184 CSTF3-HGNC:8554 CSTF3-HGNC:14981 IFIT1-HGNC:23166                                                                                                                        | N              |
| GO biological process | GO:0038113 | interleukin-9-mediated signaling pathway                             | 9         | 0        | 0.0183  | 16                 | 1                   | STAT1           | LYN-HGNC:11367 LYN-HGNC:11366 LYN-HGNC:11364 LYN-HGNC:6193 LYN-STAT1 STAT1-HGNC:11367 STAT1-HGNC:11366 STAT1-HGNC:11364 STAT1-HGNC:6190 RUNX3-HGNC:6193 IFIT3-STAT1 TXK-HGNC:11367 TXK-HGNC:11366 TXK-STAT1 TXK-HGNC:6190 IFIT1-STAT1                                                                                                                                                                            | Y              |
| GO biological process | GO:2000563 | positive regulation of CD4-positive, alpha-beta T cell proliferation | 5         | 1.00E-04 | 0.0144  | 7                  | 0                   |                 | LYN-HGNC:2665 LYN-HGNC:6570 STAT1-HGNC:11773 CXCL9-HGNC:10645 RUNX3-HGNC:11773 CCL5-HGNC:10645 CXCL10-HGNC:10645                                                                                                                                                                                                                                                                                                 | Y              |
| GO biological process | GO:0071677 | positive regulation of mononuclear cell migration                    | 19        | 0        | 0.0103  | 19                 | 2                   | CCL5 CXCL10     | LYN-HGNC:6563 LYN-HGNC:1602 LYN-HGNC:1603 LYN-HGNC:25240 LYN-HGNC:3827 STAT1-HGNC:4983 SP100-HGNC:4983 CXCL9-CXCL10 CCL5-HGNC:1603 CCL5-CXCL10 CXCL10-HGNC:9040 CXCL10-HGNC:1602 CXCL10-HGNC:1603 CXCL10-HGNC:4983 CXCL10-HGNC:10609 CXCL10-CCL5 CXCL10-HGNC:8583 CXCL10-HGNC:10672 CXCL11-CXCL10                                                                                                                | N              |
| GO biological process | GO:0045236 | CXCR chemokine receptor binding                                      | 10        | 0        | 0.0258  | 25                 | 3                   | CXCL9 CXCL11    | CXCL9-HGNC:12840 CXCL9-HGNC:6025 CXCL9-HGNC:8861 CXCL9-CXCL10 CXCL9-HGNC:10639 CXCL9-CXCL11 CXCL9-HGNC:10647 WARS-HGNC:12840 CCL5-CXCL10 CCL5-HGNC:10639 CXCL10-HGNC:12840 CXCL10-HGNC:6025 CXCL10-HGNC:8861 CXCL10-CXCL9 CXCL10-HGNC:10639 CXCL10-HGNC:10672 CXCL10-CXCL11 CXCL10-HGNC:10647 CXCL11-HGNC:12840 CXCL11-HGNC:6025 CXCL11-HGNC:8861 CXCL11-CXCL9 CXCL11-CXCL10 CXCL11-HGNC:10639 CXCL11-HGNC:10647 | Y              |

|                       |            |                                                                          |    |          |        |    |   |             |                                                                                                                                                                                                                                                                                                                                                                                                         |   |
|-----------------------|------------|--------------------------------------------------------------------------|----|----------|--------|----|---|-------------|---------------------------------------------------------------------------------------------------------------------------------------------------------------------------------------------------------------------------------------------------------------------------------------------------------------------------------------------------------------------------------------------------------|---|
| GO biological process | GO:0019773 | proteasome core complex, alpha-subunit complex                           | 8  | 2.00E-04 | 0.0129 | 10 | 0 |             | POMP-HGNC:9531 POMP-HGNC:9532 POMP-HGNC:9536 PSMB10-HGNC:9531 PSMB10-HGNC:9532 PSMB10-HGNC:9533 PSMB10-HGNC:9534 PSMB10-HGNC:9535 PSMB10-HGNC:9536 PSMB10-HGNC:9530                                                                                                                                                                                                                                     | N |
| GO biological process | GO:2000410 | regulation of thymocyte migration                                        | 4  | 2.00E-04 | 0.0155 | 6  | 0 |             | LYN-HGNC:1603 CXCL9-HGNC:10645 CCL5-HGNC:1603 CCL5-HGNC:10645 CXCL10-HGNC:1603 CXCL10-HGNC:10645                                                                                                                                                                                                                                                                                                        | N |
| GO biological process | GO:1901623 | regulation of lymphocyte chemotaxis                                      | 20 | 0        | 0.0119 | 23 | 2 | CCL5 CXCL10 | LYN-HGNC:1603 LYN-HGNC:9612 CXCL9-HGNC:10645 CXCL9-CXCL10 CXCL9-HGNC:10639 TXK-HGNC:9612 CCL5-HGNC:1603 CCL5-HGNC:10630 CCL5-HGNC:10620 CCL5-HGNC:10627 CCL5-HGNC:10645 CCL5-HGNC:10618 CCL5-CXCL10 CCL5-HGNC:10639 CXCL10-HGNC:1603 CXCL10-HGNC:10620 CXCL10-CCL5 CXCL10-HGNC:10645 CXCL10-HGNC:10634 CXCL10-HGNC:10618 CXCL10-HGNC:10639 CXCL11-CXCL10 CXCL11-HGNC:10639                              | Y |
| GO biological process | GO:0072307 | regulation of metanephric nephron tubule epithelial cell differentiation | 4  | 5.00E-04 | 0.018  | 7  | 1 | STAT1       | LYN-STAT1 STAT1-HGNC:6596 STAT1-HGNC:8622 STAT1-HGNC:8616 IFIT3-STAT1 TXK-STAT1 IFIT1-STAT1                                                                                                                                                                                                                                                                                                             | N |
| GO biological process | GO:0010820 | positive regulation of T cell chemotaxis                                 | 12 | 0        | 0.0112 | 13 | 1 | CCL5        | LYN-HGNC:1603 CXCL9-HGNC:10645 CXCL9-HGNC:10639 CCL5-HGNC:1603 CCL5-HGNC:10620 CCL5-HGNC:10645 CCL5-HGNC:10639 CXCL10-HGNC:1603 CXCL10-HGNC:10620 CXCL10-HGNC:10645 CXCL10-CCL5 CXCL10-HGNC:10639 CXCL11-HGNC:10639                                                                                                                                                                                     | Y |
| GO biological process | GO:2000503 | positive regulation of natural killer cell chemotaxis                    | 5  | 0        | 0.0144 | 7  | 1 | CCL5        | CXCL9-HGNC:10645 CCL5-HGNC:10627 CCL5-HGNC:10630 CCL5-HGNC:10645 CXCL10-HGNC:10645 CXCL10-CCL5 CXCL10-HGNC:10634                                                                                                                                                                                                                                                                                        | Y |
| GO biological process | GO:0031118 | rRNA pseudouridine synthesis                                             | 5  | 2.00E-04 | 0.0144 | 7  | 0 |             | PUS7-HGNC:2890 PUS7-HGNC:25126 PUS7-HGNC:14377 PUS7-HGNC:14378 PUS7-HGNC:14264 PAPD7-HGNC:2890 CSTF3-HGNC:14377                                                                                                                                                                                                                                                                                         | N |
| GO biological process | GO:0006398 | mRNA 3'-end processing by stem-loop binding and cleavage                 | 5  | 1.00E-04 | 0.0165 | 8  | 0 |             | PAPD7-HGNC:2325 PAPD7-HGNC:2326 PAPD7-HGNC:10904 PAPD7-HGNC:23239 PAPD7-HGNC:30860 NUP205-HGNC:2326 CSTF3-HGNC:2325 CSTF3-HGNC:2326                                                                                                                                                                                                                                                                     | N |
| GO biological process | GO:0005839 | proteasome core complex                                                  | 17 | 0        | 0.0146 | 24 | 1 | PSMB10      | POMP-HGNC:9531 POMP-HGNC:9544 POMP-HGNC:9532 POMP-HGNC:9542 POMP-HGNC:9536 POMP-HGNC:9537 POMP-HGNC:9546 POMP-HGNC:9541 PSMB10-HGNC:9531 PSMB10-HGNC:9544 PSMB10-HGNC:9532 PSMB10-HGNC:9545 PSMB10-HGNC:9542 PSMB10-HGNC:9533 PSMB10-HGNC:9543 PSMB10-HGNC:9534 PSMB10-HGNC:9535 PSMB10-HGNC:9536 PSMB10-HGNC:9537 PSMB10-HGNC:9546 PSMB10-HGNC:9539 PSMB10-HGNC:9530 PSMB10-HGNC:9541 PSMB10-HGNC:9540 | N |
| GO biological process | GO:0038110 | interleukin-2-mediated signaling pathway                                 | 11 | 1.00E-04 | 0.015  | 16 | 0 |             | LYN-HGNC:10840 LYN-HGNC:9612 LYN-HGNC:11367 LYN-HGNC:11366 LYN-HGNC:11491 LYN-HGNC:6193 STAT1-HGNC:11367 STAT1-HGNC:11366 STAT1-HGNC:6190 RUNX3-HGNC:6193 TXK-HGNC:9612 TXK-HGNC:11367 TXK-HGNC:11366 TXK-HGNC:11491 TXK-HGNC:6190 CEACAM1-HGNC:11491                                                                                                                                                   | Y |

|                       |            |                                                                    |    |   |        |    |   |             |                                                                                                                                                                                                                                                                                                                                                                                                                                                                                                                                                                                                                                                                                                                                                                                                                                                                                                                                                                                                                                                                                                                                                                                                                                                                                                                                                                                                                                                                                                                                                                                                                                                                                                                         |   |
|-----------------------|------------|--------------------------------------------------------------------|----|---|--------|----|---|-------------|-------------------------------------------------------------------------------------------------------------------------------------------------------------------------------------------------------------------------------------------------------------------------------------------------------------------------------------------------------------------------------------------------------------------------------------------------------------------------------------------------------------------------------------------------------------------------------------------------------------------------------------------------------------------------------------------------------------------------------------------------------------------------------------------------------------------------------------------------------------------------------------------------------------------------------------------------------------------------------------------------------------------------------------------------------------------------------------------------------------------------------------------------------------------------------------------------------------------------------------------------------------------------------------------------------------------------------------------------------------------------------------------------------------------------------------------------------------------------------------------------------------------------------------------------------------------------------------------------------------------------------------------------------------------------------------------------------------------------|---|
| GO biological process | GO:0010543 | regulation of platelet activation                                  | 25 | 0 | 0.0124 | 30 | 2 | CEACAM1 LYN | LYN-CEACAM1 LYN-HGNC:9070 LYN-HGNC:429 LYN-HGNC:29605 LYN-HGNC:8803 LYN-HGNC:11719 LYN-HGNC:9393 LYN-HGNC:29602 LYN-HGNC:1709 LYN-HGNC:11491 LYN-HGNC:9414 STAT1-HGNC:9399 STAT1-LYN TLR7-HGNC:11850 MASTL-HGNC:9399 MASTL-HGNC:9393 TXK-LYN TXK-HGNC:11719 TXK-HGNC:11491 CEACAM1-HGNC:3382 CEACAM1-HGNC:9070 CEACAM1-LYN CEACAM1-HGNC:429 CEACAM1-HGNC:9393 CEACAM1-HGNC:29602 CEACAM1-HGNC:1709 CEACAM1-HGNC:11491 CEACAM1-HGNC:8800 CEACAM1-HGNC:9414 IDO1-HGNC:429                                                                                                                                                                                                                                                                                                                                                                                                                                                                                                                                                                                                                                                                                                                                                                                                                                                                                                                                                                                                                                                                                                                                                                                                                                                 | N |
| GO biological process | GO:0004713 | protein tyrosine kinase activity                                   | 92 | 0 | 0.0105 | 94 | 2 | LYN IGF2R   | LYN-HGNC:365 / LYN-HGNC:405 / LYN-HGNC:4840 LYN-HGNC:3655 LYN-HGNC:3697 LYN-HGNC:3223 LYN-HGNC:1079 LYN-HGNC:6906 LYN-HGNC:5465 LYN-HGNC:6524 LYN-HGNC:8804 LYN-HGNC:9611 LYN-HGNC:12841 LYN-HGNC:8803 LYN-HGNC:77 LYN-HGNC:6091 LYN-HGNC:76 LYN-HGNC:9612 LYN-HGNC:9617 LYN-HGNC:3393 LYN-HGNC:3395 LYN-HGNC:6171 LYN-HGNC:11719 LYN-HGNC:2444 LYN-HGNC:10261 LYN-HGNC:3388 LYN-HGNC:11283 LYN-HGNC:3386 LYN-HGNC:3387 LYN-HGNC:1133 LYN-HGNC:3385 LYN-HGNC:2433 LYN-HGNC:19297 LYN-HGNC:3432 LYN-HGNC:12446 LYN-HGNC:3688 LYN-HGNC:6192 LYN-HGNC:6193 LYN-HGNC:1057 LYN-HGNC:12858 LYN-HGNC:6342 LYN-HGNC:6307 LYN-HGNC:3091 LYN-HGNC:11491 LYN-HGNC:3955 STAT1-HGNC:4840 STAT1-HGNC:3655 STAT1-LYN STAT1-HGNC:76 STAT1-HGNC:1133 STAT1-HGNC:3689 STAT1-HGNC:6192 STAT1-HGNC:6190 STAT1-HGNC:3236 SP100-HGNC:961 RUNX3-HGNC:6193 SRSF4-HGNC:3091 MASTL-HGNC:2068 MASTL-HGNC:16870 MASTL-HGNC:3091 TXK-HGNC:3657 TXK-HGNC:4037 TXK-HGNC:3697 TXK-HGNC:1079 TXK-HGNC:6906 TXK-LYN TXK-HGNC:6524 TXK-HGNC:8804 TXK-HGNC:77 TXK-HGNC:76 TXK-HGNC:9612 TXK-HGNC:9617 TXK-HGNC:6171 TXK-HGNC:11719 TXK-HGNC:2444 TXK-HGNC:11283 TXK-HGNC:3765 TXK-HGNC:3386 TXK-HGNC:1133 TXK-HGNC:3385 TXK-HGNC:19297 TXK-HGNC:12446 TXK-HGNC:6192 TXK-HGNC:6190 TXK-HGNC:1057 TXK-HGNC:12858 TXK-LYN-TXK LYN-HGNC:19383 LYN-HGNC:6192 LYN-HGNC:19391 LYN-STAT1 STAT1-HGNC:29933 STAT1-HGNC:9236 STAT1-TXK STAT1-HGNC:19383 STAT1-HGNC:12502 STAT1-HGNC:29232 STAT1-HGNC:6192 STAT1-HGNC:6190 STAT1-HGNC:9650 STAT1-HGNC:5258 STAT1-HGNC:2752 STAT1-HGNC:19391 STAT1-HGNC:24118 MT2A-HGNC:12502 RUNX3-HGNC:19383 RUNX3-HGNC:9650 IFIT3-STAT1 TXK-HGNC:19383 TXK-HGNC:6192 TXK-HGNC:6190 TXK-HGNC:9650 TXK-HGNC:24118 TXK-STAT1 IFIT1-STAT1 | N |
| GO biological process | GO:0060334 | regulation of interferon-gamma-mediated signaling pathway          | 21 | 0 | 0.0142 | 29 | 2 | TXK STAT1   | LYN-HGNC:19319 RSAD2-HGNC:6122 STAT1-HGNC:6116 STAT1-HGNC:6122 IFIT3-HGNC:6116 CEACAM1-HGNC:19319 CCL5-HGNC:19319 IFIT1-HGNC:6116                                                                                                                                                                                                                                                                                                                                                                                                                                                                                                                                                                                                                                                                                                                                                                                                                                                                                                                                                                                                                                                                                                                                                                                                                                                                                                                                                                                                                                                                                                                                                                                       | Y |
| GO biological process | GO:0034124 | regulation of MyD88-dependent toll-like receptor signaling pathway | 4  | 0 | 0.0206 | 8  | 0 |             |                                                                                                                                                                                                                                                                                                                                                                                                                                                                                                                                                                                                                                                                                                                                                                                                                                                                                                                                                                                                                                                                                                                                                                                                                                                                                                                                                                                                                                                                                                                                                                                                                                                                                                                         | Y |

|                       |            |                                                             |    |          |        |    |   |                   |                                                                                                                                                                                                                                                                                                                                                                                                                                                                                                  |   |
|-----------------------|------------|-------------------------------------------------------------|----|----------|--------|----|---|-------------------|--------------------------------------------------------------------------------------------------------------------------------------------------------------------------------------------------------------------------------------------------------------------------------------------------------------------------------------------------------------------------------------------------------------------------------------------------------------------------------------------------|---|
| GO biological process | GO:0090026 | positive regulation of monocyte chemotaxis                  | 17 | 0        | 0.0109 | 18 | 2 | CCL5 CXCL10       | LYN-HGNC:1602 LYN-HGNC:1603 LYN-HGNC:25240 LYN-HGNC:3827 STAT1-HGNC:4983 SP100-HGNC:4983 CXCL9-CXCL10 CCL5-HGNC:1603 CCL5-CXCL10 CXCL10-HGNC:9040 CXCL10-HGNC:1602 CXCL10-HGNC:1603 CXCL10-HGNC:4983 CXCL10-HGNC:10609 CXCL10-CCL5 CXCL10-HGNC:8583 CXCL10-HGNC:10672 CXCL11-CXCL10                                                                                                                                                                                                              | Y |
| GO biological process | GO:0016973 | poly(A)+ mRNA export from nucleus                           | 7  | 2.00E-04 | 0.0103 | 7  | 0 |                   | POMP-HGNC:24449 SRSF4-HGNC:8565 SRSF4-HGNC:23782 NXF1-HGNC:19073 NXF1-HGNC:23782 NXF1-HGNC:24449 NXF1-HGNC:29093                                                                                                                                                                                                                                                                                                                                                                                 | N |
| GO biological process | GO:0010793 | regulation of mRNA export from nucleus                      | 4  | 2.00E-04 | 0.0258 | 10 | 0 |                   | STAT1-HGNC:18420 SP100-HGNC:18420 SP100-HGNC:11470 SP100-HGNC:12017 SP100-HGNC:25467 NUP205-HGNC:12017 NXF1-HGNC:18420 NXF1-HGNC:11470 NXF1-HGNC:12017 NXF1-HGNC:25467                                                                                                                                                                                                                                                                                                                           | N |
| GO biological process | GO:2000564 | regulation of CD8-positive, alpha-beta T cell proliferation | 6  | 1.00E-04 | 0.012  | 7  | 0 |                   | STAT1-HGNC:6116 CXCL9-HGNC:10645 IFIT3-HGNC:6116 CEACAM1-HGNC:4962 CCL5-HGNC:10645 CXCL10-HGNC:10645 IFIT1-HGNC:6116                                                                                                                                                                                                                                                                                                                                                                             | Y |
| GO biological process | GO:0008009 | chemokine activity                                          | 27 | 0        | 0.0115 | 30 | 4 | CXCL9 CCL5 CXCL10 | CXCL9-HGNC:10645 CXCL9-HGNC:10647 CXCL9-HGNC:8861 CXCL9-HGNC:6025 CXCL9-CXCL10 CXCL9-HGNC:10639 CXCL9-CXCL11 CCL5-HGNC:10620 CCL5-HGNC:10627 CCL5-HGNC:10645 CCL5-CXCL10 CCL5-HGNC:10639 CXCL10-HGNC:10620 CXCL10-CXCL9 CXCL10-HGNC:10609 CXCL10-HGNC:10645 CXCL10-HGNC:10647 CXCL10-HGNC:8861 CXCL10-HGNC:6025 CXCL10-CCL5 CXCL10-HGNC:10634 CXCL10-HGNC:10639 CXCL10-CXCL11 CXCL10-HGNC:10672 CXCL11-CXCL9 CXCL11-HGNC:10647 CXCL11-HGNC:8861 CXCL11-HGNC:6025 CXCL11-CXCL10 CXCL11-HGNC:10639 | Y |
| GO biological process | GO:0042494 | detection of bacterial lipoprotein                          | 4  | 0        | 0.0129 | 5  | 0 |                   | LYN-HGNC:16711 LYN-HGNC:11847 TLR7-HGNC:16711 TLR7-HGNC:11848 TLR7-HGNC:11847                                                                                                                                                                                                                                                                                                                                                                                                                    | Y |
| GO biological process | GO:0004652 | polynucleotide adenylyltransferase activity                 | 8  | 0        | 0.0103 | 8  | 0 |                   | SRSF4-HGNC:26184 PAPD7-HGNC:26776 PAPD7-HGNC:26184 PAPD7-HGNC:14981 PAPD7-HGNC:25532 PAPD7-HGNC:14982 CSTF3-HGNC:26184 CSTF3-HGNC:14981                                                                                                                                                                                                                                                                                                                                                          | N |
| GO biological process | GO:0033004 | negative regulation of mast cell activation                 | 7  | 0        | 0.0103 | 7  | 0 |                   | LYN-HGNC:3655 LYN-HGNC:3358 LYN-HGNC:19319 LYN-HGNC:6570 STAT1-HGNC:3655 CEACAM1-HGNC:19319 CCL5-HGNC:19319                                                                                                                                                                                                                                                                                                                                                                                      | Y |
| GO biological process | GO:0034111 | negative regulation of homotypic cell-cell adhesion         | 11 | 0        | 0.0103 | 11 | 1 | CEACAM1           | LYN-HGNC:29605 LYN-CEACAM1 LYN-HGNC:1709 LYN-HGNC:9414 LYN-HGNC:429 STAT1-HGNC:9399 MASTL-HGNC:9399 CEACAM1-HGNC:1709 CEACAM1-HGNC:9414 CEACAM1-HGNC:429 IDO1-HGNC:429                                                                                                                                                                                                                                                                                                                           | N |
| GO biological process | GO:0031080 | nuclear pore outer ring                                     | 9  | 2.00E-04 | 0.0115 | 10 | 0 |                   | NUP205-HGNC:21182 NUP205-HGNC:30379 NUP205-HGNC:8734 NUP205-HGNC:8068 NUP205-HGNC:29929 NUP205-HGNC:18017 NUP205-HGNC:29914 NUP205-HGNC:18016 NXF1-HGNC:8068 KPNA5-HGNC:8068                                                                                                                                                                                                                                                                                                                     | N |
| GO biological process | GO:0090331 | negative regulation of platelet aggregation                 | 9  | 1.00E-04 | 0.0126 | 11 | 1 | CEACAM1           | LYN-HGNC:29605 LYN-CEACAM1 LYN-HGNC:1709 LYN-HGNC:9414 LYN-HGNC:429 STAT1-HGNC:9399 MASTL-HGNC:9399 CEACAM1-HGNC:1709 CEACAM1-HGNC:9414 CEACAM1-HGNC:429 IDO1-HGNC:429                                                                                                                                                                                                                                                                                                                           | N |

|                       |            |                                                                   |    |          |        |    |   |               |                                                                                                                                                                                                                                                                                                                                                                                                                                                                                                                                                                                                                                                                                                            |   |
|-----------------------|------------|-------------------------------------------------------------------|----|----------|--------|----|---|---------------|------------------------------------------------------------------------------------------------------------------------------------------------------------------------------------------------------------------------------------------------------------------------------------------------------------------------------------------------------------------------------------------------------------------------------------------------------------------------------------------------------------------------------------------------------------------------------------------------------------------------------------------------------------------------------------------------------------|---|
| GO biological process | GO:0006999 | nuclear pore organization                                         | 11 | 0        | 0.0141 | 15 | 1 | NUP205        | SP100-HGNC:12017 NUP205-HGNC:30379 NUP205-HGNC:25525 NUP205-HGNC:29577 NUP205-HGNC:14085 NUP205-HGNC:12017 NUP205-HGNC:8068 NUP205-HGNC:29914 NUP205-HGNC:18016 NUP205-HGNC:28958 NUP205-HGNC:8062 NXF1-HGNC:12017 NXF1-HGNC:8068 NXF1-HGNC:28958 KPNA5-HGNC:8068                                                                                                                                                                                                                                                                                                                                                                                                                                          | N |
| GO biological process | GO:0071221 | cellular response to bacterial lipopeptide                        | 6  | 4.00E-04 | 0.0103 | 6  | 0 |               | LYN-HGNC:16711 LYN-HGNC:17192 LYN-HGNC:11847 TLR7-HGNC:16711 TLR7-HGNC:11848 TLR7-HGNC:11847                                                                                                                                                                                                                                                                                                                                                                                                                                                                                                                                                                                                               | Y |
| GO biological process | GO:0019774 | proteasome core complex, beta-subunit complex                     | 11 | 0        | 0.0131 | 14 | 1 | PSMB10        | POMP-HGNC:9544 POMP-HGNC:9542 POMP-HGNC:9537 POMP-HGNC:9546 POMP-HGNC:9541 PSMB10-HGNC:9544 PSMB10-HGNC:9545 PSMB10-HGNC:9542 PSMB10-HGNC:9543 PSMB10-HGNC:9537 PSMB10-HGNC:9546 PSMB10-HGNC:9539 PSMB10-HGNC:9541 PSMB10-HGNC:9540                                                                                                                                                                                                                                                                                                                                                                                                                                                                        | N |
| GO biological process | GO:0048248 | CXCR3 chemokine receptor binding                                  | 5  | 0        | 0.0289 | 14 | 3 | CXCL9 CXCL11  | CXCL9-HGNC:8861 CXCL9-CXCL10 CXCL9-HGNC:10639 CXCL9-CXCL11 CCL5-CXCL10 CCL5-HGNC:10639 CXCL10-HGNC:8861 CXCL10-CXCL9 CXCL10-HGNC:10639 CXCL10-CXCL11 CXCL11-HGNC:8861 CXCL11-CXCL9 CXCL11-CXCL10 CXCL11-HGNC:10639                                                                                                                                                                                                                                                                                                                                                                                                                                                                                         | Y |
| GO biological process | GO:2001187 | positive regulation of CD8-positive, alpha-beta T cell activation | 6  | 2.00E-04 | 0.0137 | 8  | 1 | RUNX3         | LYN-HGNC:10471 CXCL9-HGNC:10645 RUNX3-HGNC:1539 RUNX3-HGNC:10471 RUNX3-HGNC:4862 CEACAM1-HGNC:4962 CCL5-HGNC:10645 CXCL10-HGNC:10645                                                                                                                                                                                                                                                                                                                                                                                                                                                                                                                                                                       | Y |
| GO biological process | GO:0004715 | non-membrane spanning protein tyrosine kinase activity            | 26 | 0        | 0.019  | 48 | 1 | LYN           | LYN-HGNC:11283 LYN-HGNC:3657 LYN-HGNC:3655 LYN-HGNC:3697 LYN-HGNC:1133 LYN-HGNC:1079 LYN-HGNC:9611 LYN-HGNC:12841 LYN-HGNC:77 LYN-HGNC:9612 LYN-HGNC:76 LYN-HGNC:9617 LYN-HGNC:6171 LYN-HGNC:6192 LYN-HGNC:1057 LYN-HGNC:12858 LYN-HGNC:11719 LYN-HGNC:3091 LYN-HGNC:11491 STAT1-HGNC:3655 STAT1-HGNC:1133 STAT1-LYN STAT1-HGNC:76 STAT1-HGNC:6192 STAT1-HGNC:6190 SRSF4-HGNC:3091 MASTL-HGNC:16870 MASTL-HGNC:2068 MASTL-HGNC:3091 TXK-HGNC:11283 TXK-HGNC:3657 TXK-HGNC:3697 TXK-HGNC:1133 TXK-HGNC:1079 TXK-LYN TXK-HGNC:77 TXK-HGNC:9612 TXK-HGNC:76 TXK-HGNC:9617 TXK-HGNC:6171 TXK-HGNC:6192 TXK-HGNC:6190 TXK-HGNC:1057 TXK-HGNC:12858 TXK-HGNC:11719 TXK-HGNC:11491 CEACAM1-LYN CEACAM1-HGNC:11491 | N |
| GO biological process | GO:0035456 | response to interferon-beta                                       | 19 | 0        | 0.0119 | 22 | 3 | IFITM1 IFITM2 | LYN-HGNC:9092 LYN-STAT1 STAT1-HGNC:23166 STAT1-HGNC:6116 STAT1-HGNC:1734 STAT1-HGNC:4914 IFIT3-HGNC:23166 IFIT3-HGNC:6116 IFIT3-HGNC:1734 IFIT3-HGNC:4914 IFIT3-STAT1 IFITM1-IFITM2 IFITM1-HGNC:5414 IFITM2-IFITM1 IFITM2-HGNC:5414 TXK-STAT1 IFIT1-HGNC:23166 IFIT1-HGNC:6116 IFIT1-HGNC:1734 IFIT1-HGNC:4914 IFIT1-HGNC:14348 IFIT1-STAT1                                                                                                                                                                                                                                                                                                                                                                | Y |
| GO biological process | GO:0070757 | interleukin-35-mediated signaling pathway                         | 10 | 3.00E-04 | 0.0134 | 13 | 1 | STAT1         | LYN-HGNC:11364 LYN-HGNC:6192 LYN-STAT1 STAT1-HGNC:11365 STAT1-HGNC:11364 STAT1-HGNC:6192 STAT1-HGNC:6190 STX17-HGNC:1473 IFIT3-STAT1 TXK-HGNC:6192 TXK-STAT1 TXK-HGNC:6190 IFIT1-STAT1                                                                                                                                                                                                                                                                                                                                                                                                                                                                                                                     | Y |

|                       |            |                                                                         |    |          |        |    |   |             |                                                                                                                                                                                                                                                                                                                                                           |   |
|-----------------------|------------|-------------------------------------------------------------------------|----|----------|--------|----|---|-------------|-----------------------------------------------------------------------------------------------------------------------------------------------------------------------------------------------------------------------------------------------------------------------------------------------------------------------------------------------------------|---|
| GO biological process | GO:0032727 | positive regulation of interferon-alpha production                      | 17 | 0        | 0.0127 | 21 | 2 | TLR7 STAT1  | LYN-STAT1 RSAD2-HGNC:6122 STAT1-HGNC:6118 STAT1-HGNC:18873 STAT1-HGNC:2750 STAT1-HGNC:18420 STAT1-HGNC:6122 STAT1-HGNC:1974 SP100-HGNC:18420 TLR7-HGNC:15633 TLR7-HGNC:15632 TLR7-HGNC:11849 TLR7-HGNC:11850 IFIT3-STAT1 SRSF4-HGNC:2750 TXK-STAT1 NXF1-HGNC:18420 IFIT1-HGNC:19102 IFIT1-HGNC:18873 IFIT1-HGNC:2750 IFIT1-STAT1                          | Y |
| GO biological process | GO:0042532 | negative regulation of tyrosine phosphorylation of STAT protein         | 8  | 0        | 0.0142 | 11 | 0 |             | LYN-HGNC:29605 LYN-HGNC:19383 LYN-HGNC:19391 STAT1-HGNC:9650 STAT1-HGNC:19383 STAT1-HGNC:19391 STAT1-HGNC:29232 RUNX3-HGNC:9650 RUNX3-HGNC:19383 TXK-HGNC:9650 TXK-HGNC:19383                                                                                                                                                                             | N |
| GO biological process | GO:0051770 | positive regulation of nitric-oxide synthase biosynthetic process       | 10 | 1.00E-04 | 0.0103 | 10 | 0 |             | LYN-HGNC:6307 LYN-HGNC:6192 STAT1-HGNC:6192 TLR7-HGNC:15633 TLR7-HGNC:11850 TLR7-HGNC:11848 TXK-HGNC:6192 CEACAM1-HGNC:6307 CCL5-HGNC:10618 CXCL10-HGNC:10618                                                                                                                                                                                             | N |
| GO biological process | GO:0035458 | cellular response to interferon-beta                                    | 11 | 0        | 0.0159 | 17 | 1 | STAT1       | LYN-STAT1 STAT1-HGNC:23166 STAT1-HGNC:6116 STAT1-HGNC:1734 STAT1-HGNC:4914 IFIT3-HGNC:23166 IFIT3-HGNC:6116 IFIT3-HGNC:1734 IFIT3-HGNC:4914 IFIT3-STAT1 TXK-STAT1 IFIT1-HGNC:23166 IFIT1-HGNC:6116 IFIT1-HGNC:14348 IFIT1-HGNC:1734 IFIT1-HGNC:4914 IFIT1-STAT1                                                                                           | Y |
| GO biological process | GO:0090330 | regulation of platelet aggregation                                      | 15 | 1.00E-04 | 0.0158 | 23 | 2 | CEACAM1 LYN | LYN-CEACAM1 LYN-HGNC:429 LYN-HGNC:29605 LYN-HGNC:9393 LYN-HGNC:29602 LYN-HGNC:1709 LYN-HGNC:11491 LYN-HGNC:9414 STAT1-HGNC:9399 STAT1-LYN MASTL-HGNC:9399 MASTL-HGNC:9393 TXK-LYN TXK-HGNC:11491 CEACAM1-HGNC:3382 CEACAM1-LYN CEACAM1-HGNC:429 CEACAM1-HGNC:9393 CEACAM1-HGNC:29602 CEACAM1-HGNC:1709 CEACAM1-HGNC:11491 CEACAM1-HGNC:9414 IDO1-HGNC:429 | N |
| GO biological process | GO:0051292 | nuclear pore complex assembly                                           | 9  | 0        | 0.0149 | 13 | 1 | NUP205      | SP100-HGNC:12017 NUP205-HGNC:25525 NUP205-HGNC:29577 NUP205-HGNC:14085 NUP205-HGNC:12017 NUP205-HGNC:8068 NUP205-HGNC:29914 NUP205-HGNC:28958 NUP205-HGNC:8062 NXF1-HGNC:12017 NXF1-HGNC:8068 NXF1-HGNC:28958 KPNA5-HGNC:8068                                                                                                                             | N |
| GO biological process | GO:0033007 | negative regulation of mast cell activation involved in immune response | 5  | 0        | 0.0144 | 7  | 0 |             | LYN-HGNC:3655 LYN-HGNC:3358 LYN-HGNC:19319 LYN-HGNC:6570 STAT1-HGNC:3655 CEACAM1-HGNC:19319 CCL5-HGNC:19319                                                                                                                                                                                                                                               | Y |
| GO biological process | GO:0071044 | histone mRNA catabolic process                                          | 13 | 0        | 0.0127 | 16 | 0 |             | SRSF4-HGNC:26184 SRSF4-HGNC:20472 SRSF4-HGNC:11316 PAPD7-HGNC:9962 PAPD7-HGNC:26776 PAPD7-HGNC:18189 PAPD7-HGNC:26184 PAPD7-HGNC:25817 PAPD7-HGNC:20472 PAPD7-HGNC:30654 PAPD7-HGNC:9138 PAPD7-HGNC:11316 PAPD7-HGNC:25532 PAPD7-HGNC:28981 CSTF3-HGNC:26184 PELO-HGNC:9138                                                                               | N |

|                       |            |                                            |    |          |        |    |   |              |                                                                                                                                                                                                                                                                                                                                                                                                                                                                                                                                                                                                                                                                                         |   |
|-----------------------|------------|--------------------------------------------|----|----------|--------|----|---|--------------|-----------------------------------------------------------------------------------------------------------------------------------------------------------------------------------------------------------------------------------------------------------------------------------------------------------------------------------------------------------------------------------------------------------------------------------------------------------------------------------------------------------------------------------------------------------------------------------------------------------------------------------------------------------------------------------------|---|
| GO biological process | GO:0042379 | chemokine receptor binding                 | 42 | 0        | 0.0101 | 41 | 4 | CXCL9 CCL5 C | LYN-HGNC:1603 CXCL9-HGNC:12840 CXCL9-HGNC:10645 CXCL9-HGNC:10647 CXCL9-HGNC:8861 CXCL9-HGNC:6025 CXCL9-CXCL10 CXCL9-HGNC:10639 CXCL9-CXCL11 WARS-HGNC:12840 CCL5-HGNC:10620 CCL5-HGNC:10627 CCL5-HGNC:10645 CCL5-HGNC:10630 CCL5-HGNC:1603 CCL5-CXCL10 CCL5-HGNC:10618 CCL5-HGNC:10639 CXCL10-HGNC:10620 CXCL10-CXCL9 CXCL10-HGNC:12840 CXCL10-HGNC:10609 CXCL10-HGNC:10645 CXCL10-HGNC:10647 CXCL10-HGNC:1603 CXCL10-HGNC:8861 CXCL10-HGNC:6025 CXCL10-CCL5 CXCL10-HGNC:10634 CXCL10-HGNC:10618 CXCL10-HGNC:10619 CXCL10-HGNC:10639 CXCL10-HGNC:10672 CXCL10-CXCL11 CXCL11-CXCL9 CXCL11-HGNC:12840 CXCL11-HGNC:10647 CXCL11-HGNC:8861 CXCL11-HGNC:6025 CXCL11-CXCL10 CXCL11-HGNC:10639 | Y |
| GO biological process | GO:0060330 | regulation of response to interferon-gamma | 21 | 0        | 0.0142 | 29 | 2 | TXK STAT1    | LYN-TXK LYN-HGNC:19383 LYN-HGNC:6192 LYN-HGNC:19391 LYN-STAT1 STAT1-HGNC:29933 STAT1-HGNC:9236 STAT1-TXK STAT1-HGNC:19383 STAT1-HGNC:12502 STAT1-HGNC:29232 STAT1-HGNC:6192 STAT1-HGNC:6190 STAT1-HGNC:9650 STAT1-HGNC:5258 STAT1-HGNC:2752 STAT1-HGNC:19391 STAT1-HGNC:24118 MT2A-HGNC:12502 RUNX3-HGNC:19383 RUNX3-HGNC:9650 IFIT3-STAT1 TXK-HGNC:19383 TXK-HGNC:6192 TXK-HGNC:6190 TXK-HGNC:9650 TXK-HGNC:24118 TXK-STAT1 IFIT1-STAT1                                                                                                                                                                                                                                                | Y |
| GO biological process | GO:0045309 | protein phosphorylated amino acid binding  | 39 | 2.00E-04 | 0.0114 | 43 | 0 |              | LYN-HGNC:10840 LYN-HGNC:4840 LYN-HGNC:9066 LYN-HGNC:3697 LYN-HGNC:2362 LYN-HGNC:9658 LYN-HGNC:6524 LYN-HGNC:2363 LYN-HGNC:12841 LYN-HGNC:77 LYN-HGNC:76 LYN-HGNC:12657 LYN-HGNC:12658 LYN-HGNC:9644 LYN-HGNC:12858 LYN-HGNC:10838 LYN-HGNC:4566 LYN-HGNC:11491 LYN-HGNC:9871 STAT1-HGNC:4840 STAT1-HGNC:2363 STAT1-HGNC:76 STAT1-HGNC:12657 STAT1-HGNC:9644 STAT1-HGNC:9871 SP100-HGNC:12851 MASTL-HGNC:12851 TXK-HGNC:9066 TXK-HGNC:3697 TXK-HGNC:2362 TXK-HGNC:9658 TXK-HGNC:6524 TXK-HGNC:2363 TXK-HGNC:77 TXK-HGNC:76 TXK-HGNC:12657 TXK-HGNC:9644 TXK-HGNC:12858 TXK-HGNC:4566 TXK-HGNC:11491 TXK-HGNC:9871 CEACAM1-HGNC:6524 CEACAM1-HGNC:11491                                   | N |
| GO biological process | GO:0010819 | regulation of T cell chemotaxis            | 13 | 0        | 0.0127 | 16 | 2 | CCL5 CXCL10  | LYN-HGNC:1603 CXCL9-HGNC:10645 CXCL9-CXCL10 CXCL9-HGNC:10639 CCL5-HGNC:1603 CCL5-HGNC:10620 CCL5-HGNC:10645 CCL5-CXCL10 CCL5-HGNC:10639 CXCL10-HGNC:1603 CXCL10-HGNC:10620 CXCL10-CCL5 CXCL10-HGNC:10645 CXCL10-HGNC:10639 CXCL11-CXCL10 CXCL11-HGNC:10639                                                                                                                                                                                                                                                                                                                                                                                                                              | Y |

|                       |            |                                       |    |          |        |    |   |             |                                                                                                                                                                                                                                                                                                                                                                                                                                                                                                                                                                                                                     |   |
|-----------------------|------------|---------------------------------------|----|----------|--------|----|---|-------------|---------------------------------------------------------------------------------------------------------------------------------------------------------------------------------------------------------------------------------------------------------------------------------------------------------------------------------------------------------------------------------------------------------------------------------------------------------------------------------------------------------------------------------------------------------------------------------------------------------------------|---|
| GO biological process | GO:0046831 | regulation of RNA export from nucleus | 10 | 5.00E-04 | 0.0206 | 20 | 0 |             | STAT1-HGNC:2750 STAT1-HGNC:18420 SP100-HGNC:18420 SP100-HGNC:11470 SP100-HGNC:12017 SP100-HGNC:25467 SRSF4-HGNC:7659 SRSF4-HGNC:13871 SRSF4-HGNC:18116 SRSF4-HGNC:2750 NUP205-HGNC:13871 NUP205-HGNC:12017 NUP205-HGNC:8062 CSTF3-HGNC:7659 CSTF3-HGNC:13871 NXF1-HGNC:18420 NXF1-HGNC:11470 NXF1-HGNC:12017 NXF1-HGNC:25467 IFIT1-HGNC:2750                                                                                                                                                                                                                                                                        | N |
| GO biological process | GO:0001784 | phosphotyrosine residue binding       | 32 | 5.00E-04 | 0.0132 | 41 | 0 |             | LYN-HGNC:10840 LYN-HGNC:9066 LYN-HGNC:4840 LYN-HGNC:3697 LYN-HGNC:2362 LYN-HGNC:9658 LYN-HGNC:6524 LYN-HGNC:2363 LYN-HGNC:12841 LYN-HGNC:77 LYN-HGNC:76 LYN-HGNC:12657 LYN-HGNC:12658 LYN-HGNC:9644 LYN-HGNC:10838 LYN-HGNC:12858 LYN-HGNC:4566 LYN-HGNC:11491 LYN-HGNC:9871 STAT1-HGNC:4840 STAT1-HGNC:2363 STAT1-HGNC:76 STAT1-HGNC:12657 STAT1-HGNC:9644 STAT1-HGNC:9871 TXK-HGNC:9066 TXK-HGNC:3697 TXK-HGNC:2362 TXK-HGNC:9658 TXK-HGNC:6524 TXK-HGNC:2363 TXK-HGNC:77 TXK-HGNC:76 TXK-HGNC:12657 TXK-HGNC:9644 TXK-HGNC:12858 TXK-HGNC:4566 TXK-HGNC:11491 TXK-HGNC:9871 CEACAM1-HGNC:6524 CEACAM1-HGNC:11491 | N |
| GO biological process | GO:0008334 | histone mRNA metabolic process        | 26 | 0        | 0.0123 | 31 | 0 |             | SRSF4-HGNC:11161 SRSF4-HGNC:11160 SRSF4-HGNC:11316 SRSF4-HGNC:20472 SRSF4-HGNC:26184 SRSF4-HGNC:11153 SRSF4-HGNC:7659 SRSF4-HGNC:7658 PAPD7-HGNC:2325 PAPD7-HGNC:2326 PAPD7-HGNC:30654 PAPD7-HGNC:11316 PAPD7-HGNC:25532 PAPD7-HGNC:30860 PAPD7-HGNC:9962 PAPD7-HGNC:25817 PAPD7-HGNC:20472 PAPD7-HGNC:9138 PAPD7-HGNC:23239 PAPD7-HGNC:26184 PAPD7-HGNC:28981 PAPD7-HGNC:26776 PAPD7-HGNC:18189 PAPD7-HGNC:10904 NUP205-HGNC:2326 CSTF3-HGNC:2325 CSTF3-HGNC:2326 CSTF3-HGNC:26184 CSTF3-HGNC:7659 CSTF3-HGNC:7658 PELO-HGNC:9138                                                                                  | N |
| GO biological process | GO:0010818 | T cell chemotaxis                     | 11 | 0        | 0.0103 | 11 | 2 | CXCL10 CXCL | LYN-HGNC:1603 LYN-HGNC:8978 LYN-HGNC:8977 CXCL9-CXCL10 CXCL9-CXCL11 CCL5-HGNC:10627 CCL5-HGNC:1603 CCL5-CXCL10 CXCL10-HGNC:1603 CXCL10-CXCL11 CXCL11-CXCL10                                                                                                                                                                                                                                                                                                                                                                                                                                                         | Y |



|                       |            |                                   |    |   |        |    |   |     |                                                                                                                                                                                                                                                                                                                                                                                                                                                                                                                                                                                                                                                                                                                                                                                                                                                                                                                                                                                                             |   |
|-----------------------|------------|-----------------------------------|----|---|--------|----|---|-----|-------------------------------------------------------------------------------------------------------------------------------------------------------------------------------------------------------------------------------------------------------------------------------------------------------------------------------------------------------------------------------------------------------------------------------------------------------------------------------------------------------------------------------------------------------------------------------------------------------------------------------------------------------------------------------------------------------------------------------------------------------------------------------------------------------------------------------------------------------------------------------------------------------------------------------------------------------------------------------------------------------------|---|
| GO biological process | GO:0018108 | peptidyl-tyrosine phosphorylation | 58 | 0 | 0.0121 | 68 | 1 | LYN | LYN-HGNC:3657 LYN-HGNC:4840 LYN-HGNC:4037 LYN-HGNC:3655 LYN-HGNC:3697 LYN-HGNC:5465 LYN-HGNC:6524 LYN-HGNC:9658 LYN-HGNC:9611 LYN-HGNC:8804 LYN-HGNC:8803 LYN-HGNC:77 LYN-HGNC:6091 LYN-HGNC:76 LYN-HGNC:9612 LYN-HGNC:9617 LYN-HGNC:3393 LYN-HGNC:11719 LYN-HGNC:3388 LYN-HGNC:11283 LYN-HGNC:3387 LYN-HGNC:1133 LYN-HGNC:3385 LYN-HGNC:2433 LYN-HGNC:3432 LYN-HGNC:3688 LYN-HGNC:6192 LYN-HGNC:6193 LYN-HGNC:1057 LYN-HGNC:6342 LYN-HGNC:12858 LYN-HGNC:6307 LYN-HGNC:3091 STAT1-HGNC:4840 STAT1-HGNC:3655 STAT1-LYN STAT1-HGNC:76 STAT1-HGNC:1133 STAT1-HGNC:3689 STAT1-HGNC:6192 STAT1-HGNC:3236 RUNX3-HGNC:6193 SRSF4-HGNC:3091 MASTL-HGNC:3091 TXK-HGNC:3657 TXK-HGNC:4037 TXK-HGNC:3697 TXK-LYN TXK-HGNC:6524 TXK-HGNC:9658 TXK-HGNC:8804 TXK-HGNC:77 TXK-HGNC:76 TXK-HGNC:9612 TXK-HGNC:9617 TXK-HGNC:11719 TXK-HGNC:3765 TXK-HGNC:11283 TXK-HGNC:1133 TXK-HGNC:3385 TXK-HGNC:6192 TXK-HGNC:1057 TXK-HGNC:12858 CEACAM1-LYN CEACAM1-HGNC:6524 CEACAM1-HGNC:8800 CEACAM1-HGNC:3767 CEACAM1-HGNC:6307 | N |
|-----------------------|------------|-----------------------------------|----|---|--------|----|---|-----|-------------------------------------------------------------------------------------------------------------------------------------------------------------------------------------------------------------------------------------------------------------------------------------------------------------------------------------------------------------------------------------------------------------------------------------------------------------------------------------------------------------------------------------------------------------------------------------------------------------------------------------------------------------------------------------------------------------------------------------------------------------------------------------------------------------------------------------------------------------------------------------------------------------------------------------------------------------------------------------------------------------|---|

|                       |            |                                                                                   |    |          |        |    |   |        |                                                                                                                                                                                                                                                                                                                                               |   |
|-----------------------|------------|-----------------------------------------------------------------------------------|----|----------|--------|----|---|--------|-----------------------------------------------------------------------------------------------------------------------------------------------------------------------------------------------------------------------------------------------------------------------------------------------------------------------------------------------|---|
| GO biological process | GO:0039528 | cytoplasmic pattern recognition receptor signaling pathway in response 4 to virus | 4  | 0        | 0.0155 | 6  | 0 |        | RSAD2-HGNC:6122 STAT1-HGNC:18873 STAT1-HGNC:6122 STAT1-HGNC:6118 IFIT1-HGNC:18873 IFIT1-HGNC:19102                                                                                                                                                                                                                                            | Y |
| GO biological process | GO:0035754 | B cell chemotaxis                                                                 | 5  | 1.00E-04 | 0.0103 | 5  | 1 | CYP7B1 | LYN-HGNC:8977 CXCL9-HGNC:10639 CCL5-HGNC:10639 CXCL10-HGNC:10639 CXCL11-HGNC:10639                                                                                                                                                                                                                                                            | Y |
| GO biological process | GO:0035723 | interleukin-15-mediated signaling pathway                                         | 13 | 2.00E-04 | 0.0127 | 16 | 0 |        | LYN-HGNC:10840 LYN-HGNC:6193 LYN-HGNC:4566 LYN-HGNC:11367 LYN-HGNC:11366 LYN-HGNC:11364 STAT1-HGNC:6190 STAT1-HGNC:11367 STAT1-HGNC:11366 STAT1-HGNC:11364 RUNX3-HGNC:6193 IFITM1-HGNC:1678 TXK-HGNC:6190 TXK-HGNC:4566 TXK-HGNC:11367 TXK-HGNC:11366                                                                                         | Y |
| GO biological process | GO:0070102 | interleukin-6-mediated signaling pathway                                          | 16 | 0        | 0.0148 | 23 | 1 | STAT1  | LYN-HGNC:3655 LYN-HGNC:6192 LYN-HGNC:9644 LYN-HGNC:1541 LYN-HGNC:19391 LYN-HGNC:11364 LYN-STAT1 RSAD2-HGNC:6018 STAT1-HGNC:3655 STAT1-HGNC:16850 STAT1-HGNC:6192 STAT1-HGNC:9644 STAT1-HGNC:6190 STAT1-HGNC:19391 STAT1-HGNC:6770 STAT1-HGNC:11364 IFIT3-STAT1 TXK-HGNC:6192 TXK-HGNC:9644 TXK-HGNC:6190 TXK-STAT1 NXF1-HGNC:1833 IFIT1-STAT1 | Y |
| GO biological process | GO:0031727 | CCR2 chemokine receptor binding                                                   | 4  | 2.00E-04 | 0.0129 | 5  | 0 |        | LYN-HGNC:1603 CCL5-HGNC:1603 CCL5-HGNC:10618 CXCL10-HGNC:1603 CXCL10-HGNC:10618                                                                                                                                                                                                                                                               | Y |
| GO biological process | GO:0031957 | very long-chain fatty acid-CoA ligase activity                                    | 5  | 1.00E-04 | 0.0103 | 5  | 0 |        | ACSL1-HGNC:10999 ACSL1-HGNC:3571 ACSL1-HGNC:29567 ACSL1-HGNC:10996 STX17-HGNC:3571                                                                                                                                                                                                                                                            | N |
| GO biological process | GO:0038114 | interleukin-21-mediated signaling pathway                                         | 7  | 5.00E-04 | 0.0162 | 11 | 1 | STAT1  | LYN-HGNC:11364 LYN-HGNC:6193 LYN-STAT1 STAT1-HGNC:11365 STAT1-HGNC:11364 STAT1-HGNC:6190 RUNX3-HGNC:6193 IFIT3-STAT1 TXK-STAT1 TXK-HGNC:6190 IFIT1-STAT1                                                                                                                                                                                      | Y |

|                       |            |                                                                |    |          |        |    |   |        |                                                                                                                                                                                                                                                                 |   |
|-----------------------|------------|----------------------------------------------------------------|----|----------|--------|----|---|--------|-----------------------------------------------------------------------------------------------------------------------------------------------------------------------------------------------------------------------------------------------------------------|---|
| GO biological process | GO:0033634 | positive regulation of cell-cell adhesion mediated by integrin | 6  | 0        | 0.0155 | 9  | 1 | CCL5   | LYN-HGNC:15605 CXCL9-HGNC:10639 TXK-HGNC:15605 CCL5-HGNC:9171 CCL5-HGNC:15605 CCL5-HGNC:10639 CXCL10-HGNC:10639 CXCL10-HGNC:10639 CXCL11-HGNC:10639                                                                                                             | N |
| GO biological process | GO:0017056 | structural constituent of nuclear pore                         | 10 | 0        | 0.0155 | 15 | 1 | NUP205 | SP100-HGNC:12017 NUP205-HGNC:13722 NUP205-HGNC:25525 NUP205-HGNC:12017 NUP205-HGNC:8068 NUP205-HGNC:18017 NUP205-HGNC:29914 NUP205-HGNC:18016 NUP205-HGNC:28958 NUP205-HGNC:8062 NXF1-HGNC:13722 NXF1-HGNC:12017 NXF1-HGNC:8068 NXF1-HGNC:28958 KPNA5-HGNC:8068 | N |
| GO biological process | GO:0090661 | box H/ACA telomerase RNP complex                               | 4  | 4.00E-04 | 0.0155 | 6  | 0 |        | PUS7-HGNC:2890 PUS7-HGNC:14377 PUS7-HGNC:14378 PUS7-HGNC:14264 PAPD7-HGNC:2890 CSTF3-HGNC:14377                                                                                                                                                                 | N |
| GO biological process | GO:0034513 | box H/ACA snoRNA binding                                       | 4  | 4.00E-04 | 0.0155 | 6  | 0 |        | PUS7-HGNC:2890 PUS7-HGNC:14377 PUS7-HGNC:14378 PUS7-HGNC:14264 PAPD7-HGNC:2890 CSTF3-HGNC:14377                                                                                                                                                                 | N |
| GO biological process | GO:0044615 | nuclear pore nuclear basket                                    | 11 | 3.00E-04 | 0.0112 | 12 | 0 |        | POMP-HGNC:24449 SP100-HGNC:12017 NUP205-HGNC:12017 NUP205-HGNC:8068 NUP205-HGNC:9848 NUP205-HGNC:6763 NUP205-HGNC:8062 NXF1-HGNC:25653 NXF1-HGNC:12017 NXF1-HGNC:8068 NXF1-HGNC:24449 KPNA5-HGNC:8068                                                           | N |
