# Supplementary material for: HIR V2: a human interactome resource for the biological interpretation of differentially expressed genes via gene set linkage analysis
Source: Oxford University Press journal article supplement (doi:10.1093/database/baab009), 2021-01-01
Supplement: baab009_supp.zip [file baab009_supp.zip]

**Table S5. Annotations produced by the GO enrichment analysis tool for the downregulated genes.**

|                                                                                 |                                                     |               |                     |                       |                            |                        |                |                |
|---------------------------------------------------------------------------------|-----------------------------------------------------|---------------|---------------------|-----------------------|----------------------------|------------------------|----------------|----------------|
| Analysis Type:                                                                  | PANTHER Overrepresentation Test (Released 20190711) |               |                     |                       |                            |                        |                |                |
| Annotation Version and Release Date:                                            | GO Ontology database Released 2019-10-08            |               |                     |                       |                            |                        |                |                |
| Analyzed List:                                                                  | upload_1 (Homo sapiens)                             |               |                     |                       |                            |                        |                |                |
| Reference List:                                                                 | Homo sapiens (all genes in database)                |               |                     |                       |                            |                        |                |                |
| Test Type:                                                                      | FISHER                                              |               |                     |                       |                            |                        |                |                |
| Correction:                                                                     | FDR                                                 |               |                     |                       |                            |                        |                |                |
| GO biological process complete                                                  | Homo sapiens - REFLIST (20996)                      | upload_1 (96) | upload_1 (expected) | upload_1 (over/under) | upload_1 (fold Enrichment) | upload_1 (raw P-value) | upload_1 (FDR) | Supported term |
| response to interferon-alpha (GO:0035455)                                       | 24                                                  | 4             | 0.11                | +                     | 36.45                      | 7.59E-06               | 3.45E-03       | Y              |
| type I interferon signaling pathway (GO:0060337)                                | 67                                                  | 11            | 0.31                | +                     | 35.91                      | 5.83E-14               | 4.63E-10       | Y              |
| cellular response to type I interferon (GO:0071357)                             | 67                                                  | 11            | 0.31                | +                     | 35.91                      | 5.83E-14               | 3.09E-10       | Y              |
| response to type I interferon (GO:0034340)                                      | 72                                                  | 11            | 0.33                | +                     | 33.41                      | 1.19E-13               | 4.72E-10       | Y              |
| negative regulation of viral genome replication (GO:0045071)                    | 63                                                  | 8             | 0.29                | +                     | 27.77                      | 1.15E-09               | 1.02E-06       | Y              |
| negative regulation of viral process (GO:0048525)                               | 104                                                 | 10            | 0.48                | +                     | 21.03                      | 1.09E-10               | 1.92E-07       | Y              |
| negative regulation of viral life cycle (GO:1903901)                            | 86                                                  | 8             | 0.39                | +                     | 20.34                      | 1.11E-08               | 7.64E-06       | Y              |
| regulation of viral genome replication (GO:0045069)                             | 98                                                  | 9             | 0.45                | +                     | 20.09                      | 1.42E-09               | 1.19E-06       | Y              |
| lymphocyte chemotaxis (GO:0048247)                                              | 49                                                  | 4             | 0.22                | +                     | 17.85                      | 9.95E-05               | 3.51E-02       | Y              |
| defense response to virus (GO:0051607)                                          | 200                                                 | 15            | 0.91                | +                     | 16.4                       | 5.15E-14               | 8.20E-10       | Y              |
| interferon-gamma-mediated signaling pathway (GO:0060333)                        | 72                                                  | 5             | 0.33                | +                     | 15.19                      | 2.68E-05               | 1.09E-02       | Y              |
| regulation of viral life cycle (GO:1903900)                                     | 146                                                 | 9             | 0.67                | +                     | 13.48                      | 3.72E-08               | 2.37E-05       | Y              |
| regulation of viral process (GO:0050792)                                        | 207                                                 | 12            | 0.95                | +                     | 12.68                      | 3.37E-10               | 5.36E-07       | Y              |
| response to virus (GO:0009615)                                                  | 287                                                 | 16            | 1.31                | +                     | 12.19                      | 5.22E-13               | 1.66E-09       | Y              |
| regulation of symbiosis, encompassing mutualism through parasitism (GO:0043903) | 225                                                 | 12            | 1.03                | +                     | 11.66                      | 8.33E-10               | 9.46E-07       | Y              |
| negative regulation of multi-organism process (GO:0043901)                      | 227                                                 | 12            | 1.04                | +                     | 11.56                      | 9.17E-10               | 9.72E-07       | N              |
| response to interferon-gamma (GO:0034341)                                       | 186                                                 | 8             | 0.85                | +                     | 9.41                       | 2.94E-06               | 1.56E-03       | Y              |
| modification of morphology or physiology of other organism (GO:0035821)         | 185                                                 | 7             | 0.85                | +                     | 8.28                       | 2.79E-05               | 1.11E-02       | N              |
| cellular response to interferon-gamma (GO:0071346)                              | 164                                                 | 6             | 0.75                | +                     | 8                          | 1.28E-04               | 4.42E-02       | Y              |
| cytokine-mediated signaling pathway (GO:0019221)                                | 692                                                 | 19            | 3.16                | +                     | 6                          | 4.14E-10               | 5.98E-07       | Y              |
| regulation of multi-organism process (GO:0043900)                               | 779                                                 | 19            | 3.56                | +                     | 5.33                       | 2.79E-09               | 2.11E-06       | N              |
| defense response to other organism (GO:0098542)                                 | 952                                                 | 23            | 4.35                | +                     | 5.28                       | 5.20E-11               | 1.03E-07       | Y              |
| innate immune response (GO:0045087)                                             | 766                                                 | 18            | 3.5                 | +                     | 5.14                       | 1.36E-08               | 9.01E-06       | Y              |
| regulation of response to biotic stimulus (GO:0002831)                          | 527                                                 | 12            | 2.41                | +                     | 4.98                       | 6.10E-06               | 2.94E-03       | Y              |
| immune effector process (GO:0002252)                                            | 1079                                                | 23            | 4.93                | +                     | 4.66                       | 5.78E-10               | 7.65E-07       | Y              |
| interspecies interaction between organisms (GO:0044419)                         | 855                                                 | 18            | 3.91                | +                     | 4.6                        | 6.97E-08               | 4.26E-05       | N              |
| defense response (GO:0006952)                                                   | 1342                                                | 27            | 6.14                | +                     | 4.4                        | 4.53E-11               | 1.03E-07       | Y              |
| symbiotic process (GO:0044403)                                                  | 783                                                 | 15            | 3.58                | +                     | 4.19                       | 3.08E-06               | 1.58E-03       | Y              |
| response to other organism (GO:0051707)                                         | 1327                                                | 25            | 6.07                | +                     | 4.12                       | 1.08E-09               | 1.08E-06       | Y              |
| response to external biotic stimulus (GO:0043207)                               | 1329                                                | 25            | 6.08                | +                     | 4.11                       | 1.12E-09               | 1.04E-06       | Y              |
| viral process (GO:0016032)                                                      | 702                                                 | 13            | 3.21                | +                     | 4.05                       | 2.12E-05               | 9.12E-03       | Y              |
| cellular response to cytokine stimulus (GO:0071345)                             | 1027                                                | 19            | 4.7                 | +                     | 4.05                       | 2.06E-07               | 1.17E-04       | Y              |
| response to biotic stimulus (GO:0009607)                                        | 1353                                                | 25            | 6.19                | +                     | 4.04                       | 1.60E-09               | 1.27E-06       | Y              |
| response to cytokine (GO:0034097)                                               | 1118                                                | 20            | 5.11                | +                     | 3.91                       | 1.59E-07               | 9.35E-05       | Y              |
| regulation of defense response (GO:0031347)                                     | 769                                                 | 13            | 3.52                | +                     | 3.7                        | 5.35E-05               | 1.98E-02       | Y              |
| immune response (GO:0006955)                                                    | 1868                                                | 30            | 8.54                | +                     | 3.51                       | 6.38E-10               | 7.80E-07       | Y              |

|                                                      |       |    |       |   |      |          |          |   |
|------------------------------------------------------|-------|----|-------|---|------|----------|----------|---|
| regulation of immune response (GO:0050776)           | 1139  | 16 | 5.21  | + | 3.07 | 6.20E-05 | 2.24E-02 | Y |
| immune system process (GO:0002376)                   | 2806  | 39 | 12.83 | + | 3.04 | 4.07E-11 | 1.08E-07 | Y |
| regulation of immune system process (GO:0002682)     | 1667  | 22 | 7.62  | + | 2.89 | 5.40E-06 | 2.68E-03 | Y |
| multi-organism process (GO:0051704)                  | 2832  | 36 | 12.95 | + | 2.78 | 3.82E-09 | 2.76E-06 | N |
| response to external stimulus (GO:0009605)           | 2443  | 29 | 11.17 | + | 2.6  | 9.51E-07 | 5.22E-04 | N |
| cell surface receptor signaling pathway (GO:0007166) | 2417  | 27 | 11.05 | + | 2.44 | 8.01E-06 | 3.54E-03 | N |
| response to organic substance (GO:0010033)           | 3019  | 30 | 13.8  | + | 2.17 | 2.65E-05 | 1.11E-02 | N |
| response to stress (GO:0006950)                      | 3580  | 35 | 16.37 | + | 2.14 | 7.43E-06 | 3.47E-03 | N |
| response to chemical (GO:0042221)                    | 4485  | 37 | 20.51 | + | 1.8  | 1.42E-04 | 4.82E-02 | N |
| biological_process (GO:0008150)                      | 17840 | 94 | 81.57 | + | 1.15 | 4.21E-05 | 1.63E-02 | N |
| Unclassified (UNCLASSIFIED)                          | 3156  | 2  | 14.43 | - | 0.14 | 4.21E-05 | 1.59E-02 | N |
