# Supplementary material for: HIR V2: a human interactome resource for the biological interpretation of differentially expressed genes via gene set linkage analysis
Source: Oxford University Press journal article supplement (doi:10.1093/database/baab009), 2021-01-01
Supplement: baab009_supp.zip [file baab009_supp.zip]

**Table S1. Evidence of functional association and methods to compute feature values.**

| Feature                 | Data source/ Data set |                     | Statistics                      |
|-------------------------|-----------------------|---------------------|---------------------------------|
| Shared Annotation       | GOC                   | Cellular component  | Maximum Shared Annotation Score |
|                         |                       | Biological process  |                                 |
|                         |                       | Molecular function  |                                 |
| Homologous Interactions | Inparanoid            |                     | Maximum                         |
| Domain Interaction      | IDDI                  | 3DID                | Maximum Shared Domain Score     |
|                         |                       | IPFAM               |                                 |
|                         |                       | PINS                |                                 |
|                         |                       | TW                  |                                 |
|                         |                       | HIMAP               |                                 |
|                         |                       | DOMAINGA            |                                 |
|                         |                       | PVALUE              |                                 |
|                         |                       | IPPRI               |                                 |
|                         |                       | RCDP                |                                 |
|                         |                       | DIPD                |                                 |
|                         |                       | RDFD                |                                 |
|                         |                       | DPEA                |                                 |
|                         |                       | ME                  |                                 |
|                         |                       | PE                  |                                 |
|                         |                       | DIMA_STRING         |                                 |
|                         |                       | KGIDDI              |                                 |
|                         |                       | LLZ                 |                                 |
|                         |                       | GPE                 |                                 |
|                         |                       | DIMA_DPROF          |                                 |
|                         |                       | APMM                |                                 |
| Co-localization         | Compartments          | Knowledge channel   | Cosine Similarity Score         |
|                         |                       | Experiments channel |                                 |
|                         |                       | Text mining channel |                                 |
|                         |                       | Predictions channel |                                 |
| Co-expression           | COXPRESdb             | Microarray          | Pearson's Correlation Score     |
|                         |                       | RNASeq              |                                 |
| Phylogenetic Profile    | DIOPT                 |                     | Mutual Information Score        |
|                         |                       |                     | Pearson's Correlation Score     |
|                         |                       |                     | Tanimato Correlation Score      |
